# Supplementary material
Source: PubMed Central journal article supplement (PMC3653566)
Supplement: supp_blood-2012-06-437202_blood-2012-06-437202-1.pdf [file supp_blood-2012-06-437202_blood-2012-06-437202-1.pdf]

Supplemental Data for

**Peptide length determines the outcome of T cell receptor/peptide-MHCI engagement**

Julia Ekeruche-Makinde<sup>\*</sup>, John J. Miles<sup>\*</sup>, Hugo A. van den Berg<sup>\*</sup>, Ania Skowera, David K. Cole, Garry Dolton, Andrea J.A. Schauenburg, Mai Ping Tan, Johanne M. Pentier, Sian Llewellyn-Lacey, Kim M. Miles, Anna M. Bulek, Mathew Clement, Tamsin Williams, Andrew Trimby, Mick Bailey, Pierre Rizkallah, Jamie Rossjohn, Mark Peakman, David A. Price, Scott R. Burrows<sup>\*</sup>, Andrew K. Sewell<sup>\*</sup> and Linda Wooldridge<sup>\*</sup>

File prepared by LW. E-mail: [wooldridgel@cardiff.ac.uk](mailto:wooldridgel@cardiff.ac.uk)

<sup>\*</sup>These authors contributed equally to this work.

SD Figures S1 to S7

SD Table S1 & S2

SD References

## **SUPPLEMENTAL FIGURE LEGENDS**

### **Figure S1: MHCI-peptide length preference correlates with length of the "index" peptide.**

$6 \times 10^4$  target cells expressing either HLA A\*0201 or HLA B\*3501 were pulsed in duplicate with the following "sizing scan" mixtures (1mM) for 2 hours at 37°C:  $x^8$ ,  $x^9$ ,  $x^{10}$ ,  $x^{11}$ ,  $x^{12}$  and  $x^{13}$  (where x is any of the 19 proteogenic L-amino acids excluding cysteine). Subsequently,  $3 \times 10^4$  ILA1 (A), 1E6 (B), SB14 (C), SB10 (D) or SB27 (E) CD8<sup>+</sup> T-cells were added and incubated overnight. The supernatant was then harvested and assayed for MIP1 $\beta$  by ELISA. Error bars represent SDs, data are representative of a minimum of three separate experiments.

### **Figure S2: The unique MHCI-peptide length footprint of ILA1.**

$6 \times 10^4$  target cells expressing HLA A\*0201 were pulsed in duplicate with mixtures from 8mer (A), 9mer (B), 10mer (C), 11mer (D), 12mer (E) or 13mer (F) CPL scans (100  $\mu$ M) at 37°C. After 2 hours,  $3 \times 10^4$  ILA1 CD8<sup>+</sup> T-cells were added and incubated overnight. The supernatant was then harvested and assayed for MIP1 $\beta$  by ELISA. Error bars represent SDs, data are representative of a minimum of three separate experiments.

### **Figure S3: The unique MHCI-peptide length footprint of 1E6.**

$6 \times 10^4$  target cells expressing HLA A\*0201 were pulsed in duplicate with mixtures from 8mer (A), 9mer (B), 10mer (C), 11mer (D), 12mer (E) or 13mer (F) CPL scans (100  $\mu$ M) at 37°C. After 2 hours,  $3 \times 10^4$  1E6 CD8<sup>+</sup> T-cells were added and incubated overnight. The supernatant was then harvested and assayed for MIP1 $\beta$  by ELISA. Error bars represent SDs, data are representative of a minimum of three separate experiments.

### **Figure S4: The unique MHCI-peptide length footprint of MEL5.**

$6 \times 10^4$  target cells expressing HLA A\*0201 were pulsed in duplicate with mixtures from 8mer (A), 9mer (B), 10mer (C), 11mer (D), 12mer (E) or 13mer (F) CPL scans (100  $\mu$ M) at 37°C. After 2 hours,  $3 \times 10^4$  MEL5 CD8<sup>+</sup> T-cells were added and incubated overnight. The supernatant was then harvested and assayed for MIP1 $\beta$  by ELISA. Error bars represent SDs, data are representative of a minimum of three separate experiments.

### **Figure S5: The unique MHCI-peptide length footprint of SB27.**

$6 \times 10^4$  target cells expressing HLA B\*3508 were pulsed in duplicate with mixtures from 8mer (A), 9mer (B), 10mer (C), 11mer (D), 12mer (E) or 13mer (F) CPL scans (100  $\mu$ M) at 37°C.

After 2 hours,  $3 \times 10^4$  SB27 CD8<sup>+</sup> T-cells were added and incubated overnight. The supernatant was then harvested and assayed for MIP1 $\beta$  by ELISA. Error bars represent SDs, data are representative of a minimum of three separate experiments.

**Figure S6: Sizing scan mixtures of all lengths are capable of binding HLA A\*0201.**

$0.5 \times 10^6$  T2 cells were incubated in RPMI 1640 with either 100  $\mu$ M HPVGEADYFEY (non-HLA A\*0201 binder), or various concentrations of the indicated sizing scan mixture ( $x^8$ ,  $x^9$ ,  $x^{10}$ ,  $x^{11}$ ,  $x^{12}$  or  $x^{13}$ ) at 26°C for 14–16 hours, then at 37°C for 2 hours (A) or a further 2 hours at 37°C (B) before staining for HLA A\*0201 surface expression. Duplicate samples were acquired for each condition using a FACSCantoII flow cytometer. Data were analyzed with FlowJo software. DMSO controls at the appropriate concentration for each peptide or peptide mixture subsequently stained for HLA A\*0201 surface expression were used to subtract background from each sample. Error bars represent SDs. Although, it is interesting to note that a hierarchy of binding begins to appear at lower concentrations and under melting conditions, it is important to note that sizing scan mixtures are not used under these conditions in the main study.

**Figure S7: The CDR1 $\alpha$  loop of the MEL5 TCR lies closely over the N-terminus of the ELA peptide.** The interactions between the CDR1 $\alpha$  loop of the MEL5 TCR (shown as yellow sticks) and the N-terminus of the ELAGIGILTV peptide (shown as blue sticks) are shown. Van der Waals interactions (4Å cut-off) are depicted as red dotted lines and hydrogen bonds (3.4Å cut-off) are shown as black dotted lines. Unusually for a TCR/pMHC interaction, the MEL5 TCR makes a number of important contacts with the N-terminus of the peptide. These contacts include hydrogen bonds between the TCR CDR1 $\alpha$  residue Gln31 and peptide residues Glu1, Leu2, Gly4 and Ile5.

**SUPPLEMENTAL TABLE LEGENDS**

**Table S1: 1E6 recognition of 11mer and 12mer peptides sampled from a large peptide set selected by CPL-based importance sampling.** Simultaneous curve fitting (as described previously<sup>1</sup>) was used to estimate functional sensitivity measured as  $pEC_{50}$ .

**Table S2:** Data collection and refinement statistics (molecular replacement) for HLA A\*0201-ILAKFLHRL. PDB code: 414W.

**SUPPLEMENTAL REFERENCES**

1. Wooldridge L, Ekeruche-Makinde J, van den Berg HA, et al. A single autoimmune T cell receptor recognizes more than a million different peptides. *J Biol Chem.* 2012;287(2):1168-1177.

Figure S1

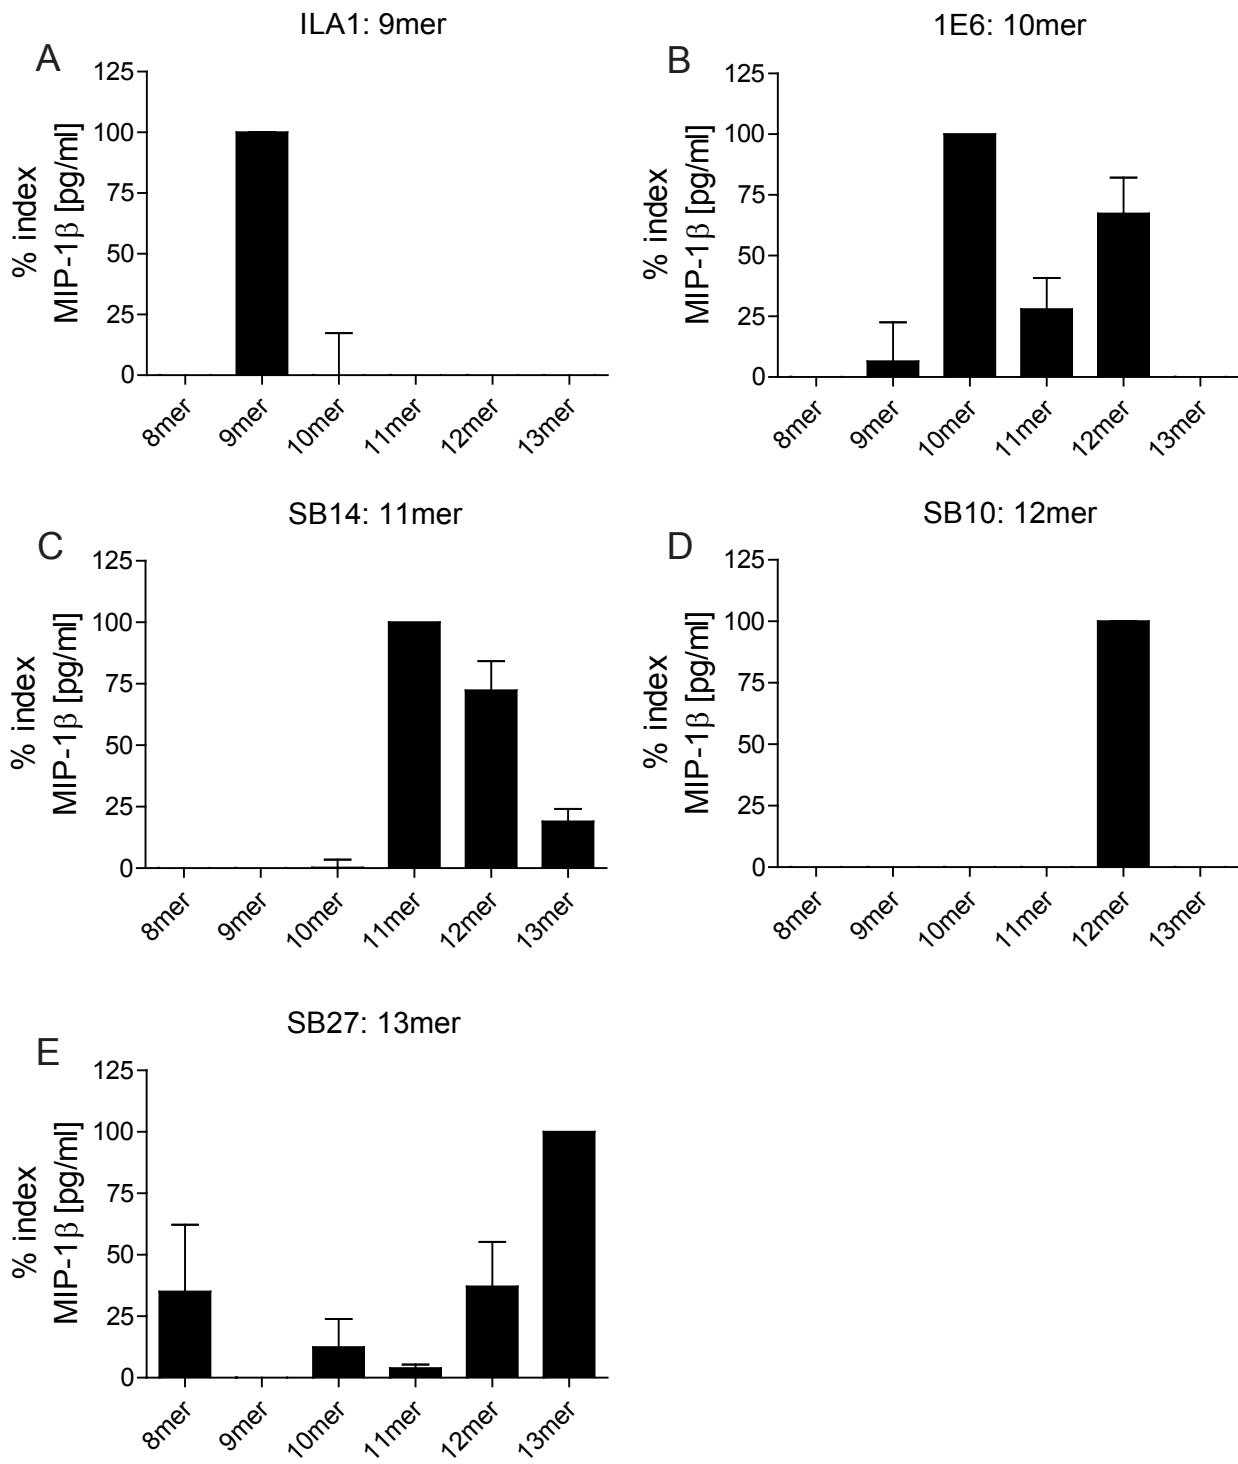

Figure S2A

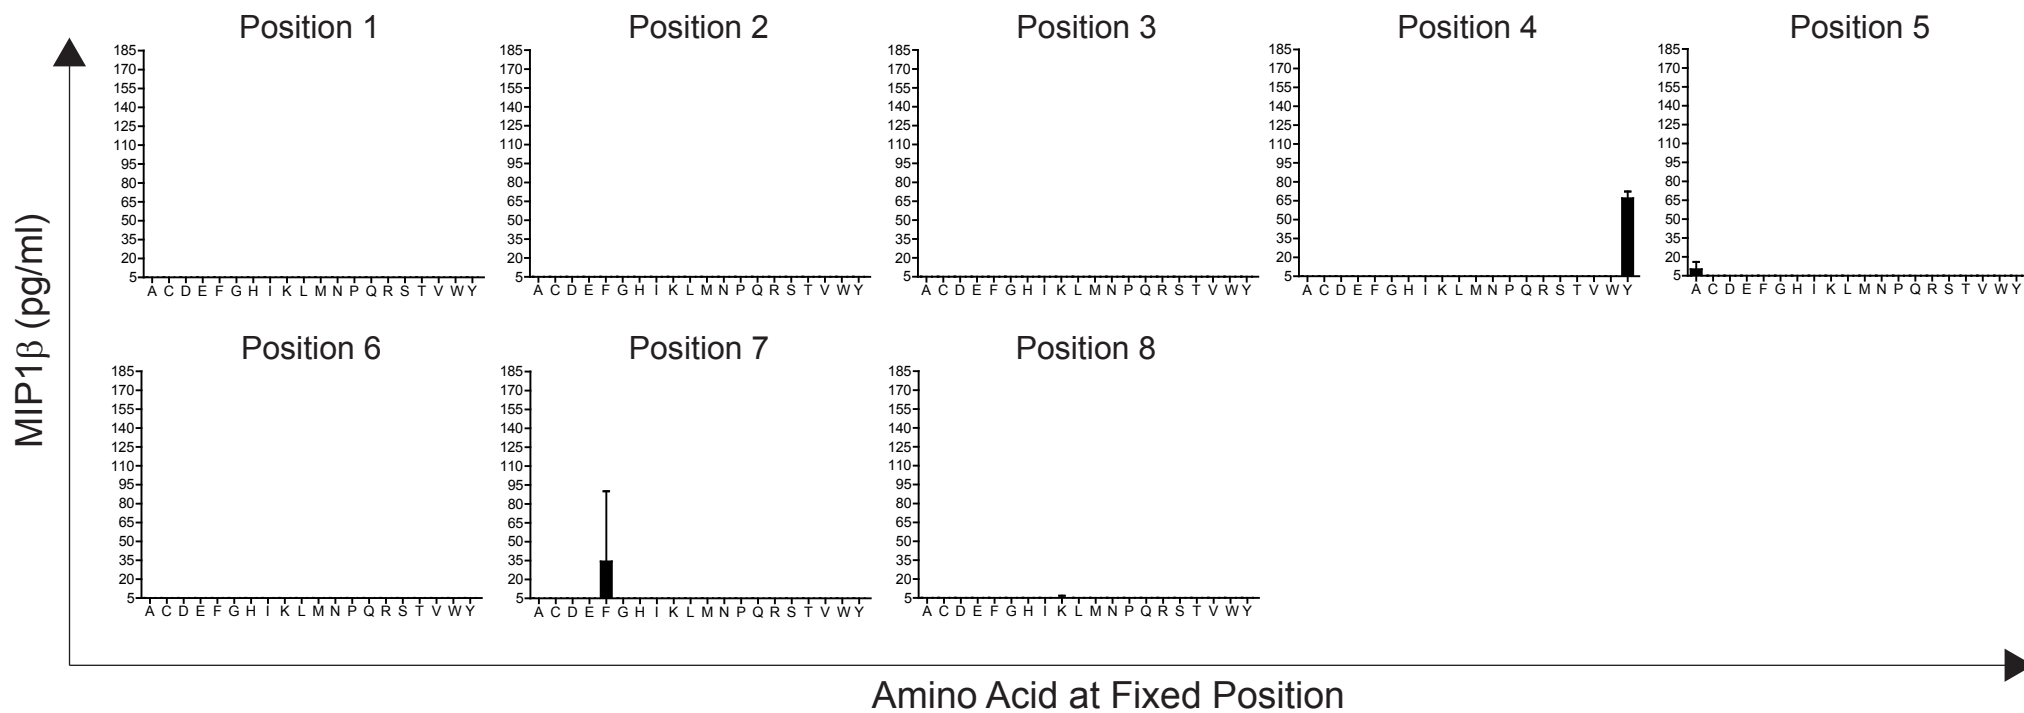

Figure S2B

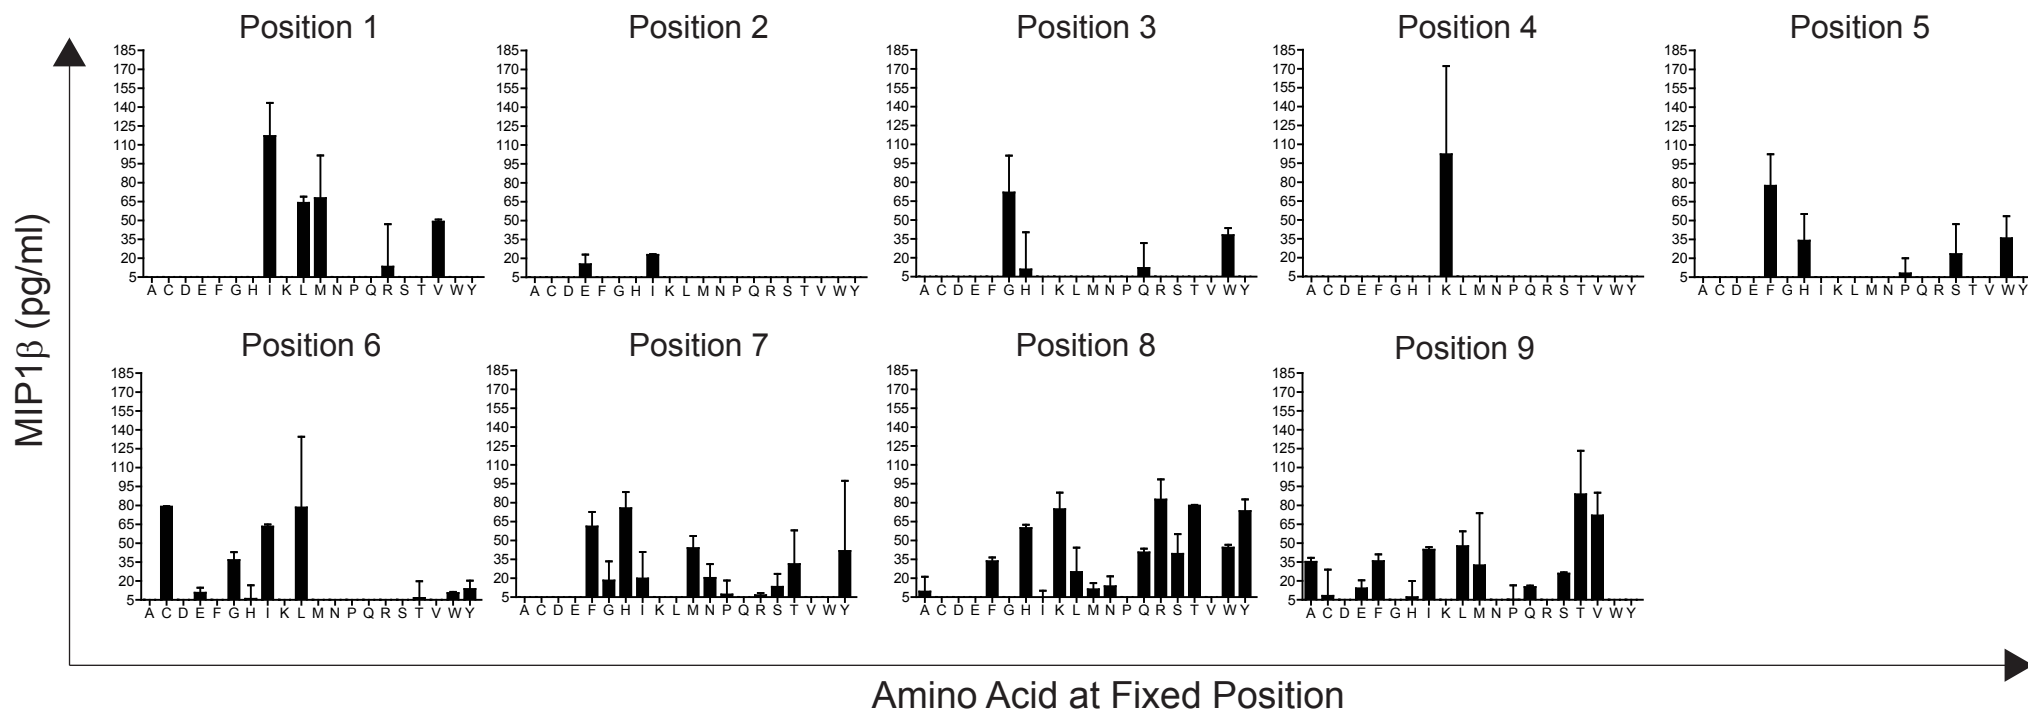

Figure S2C

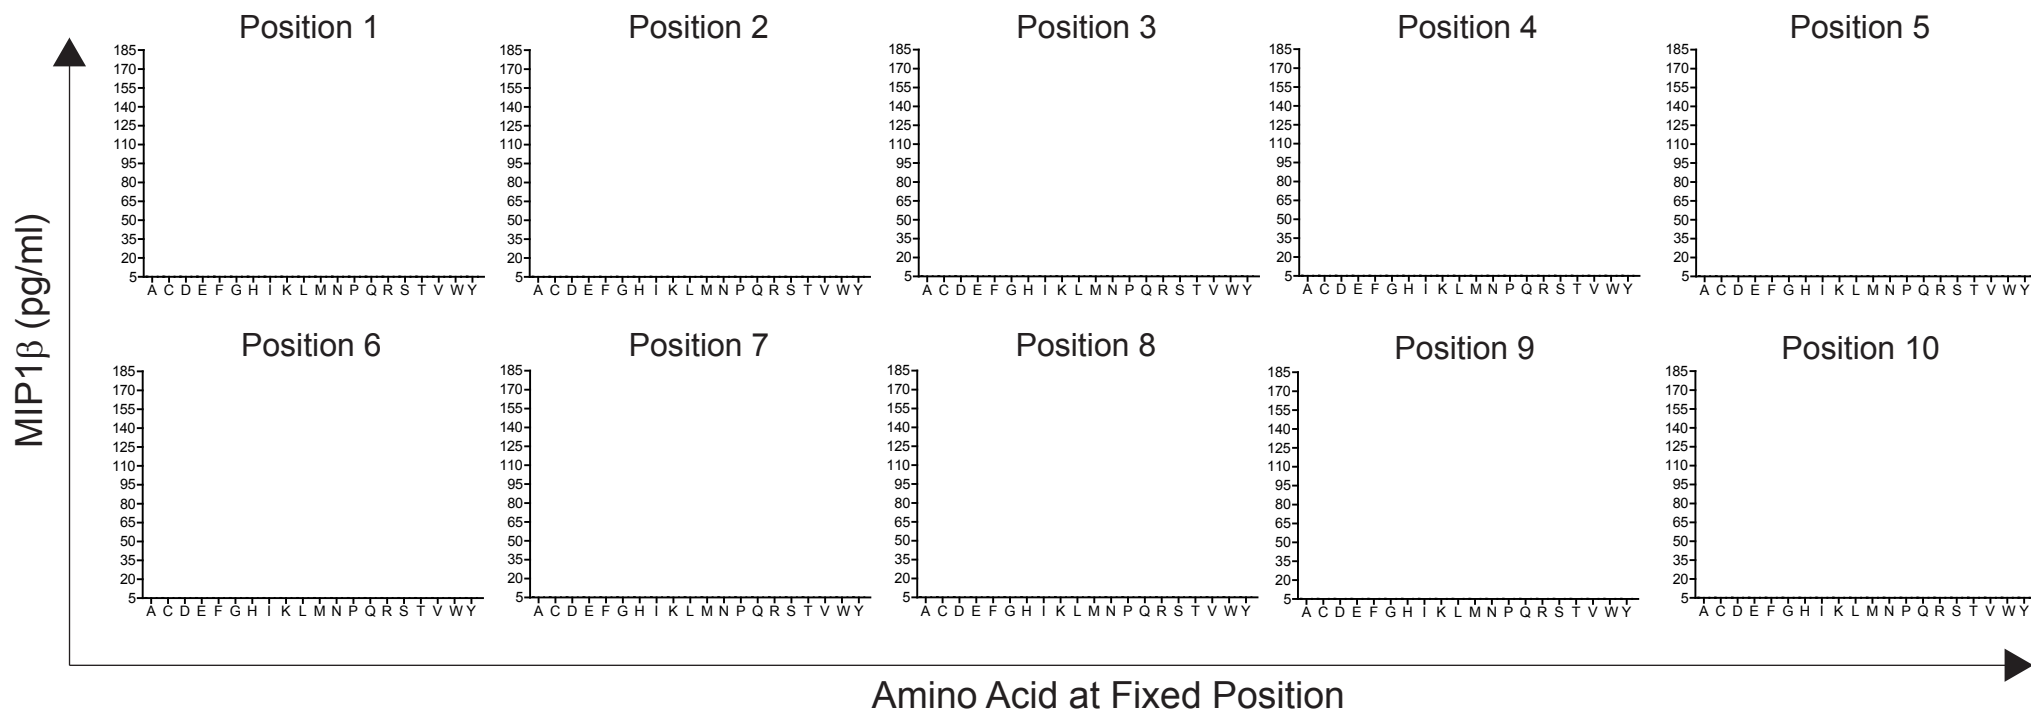



Figure S2D

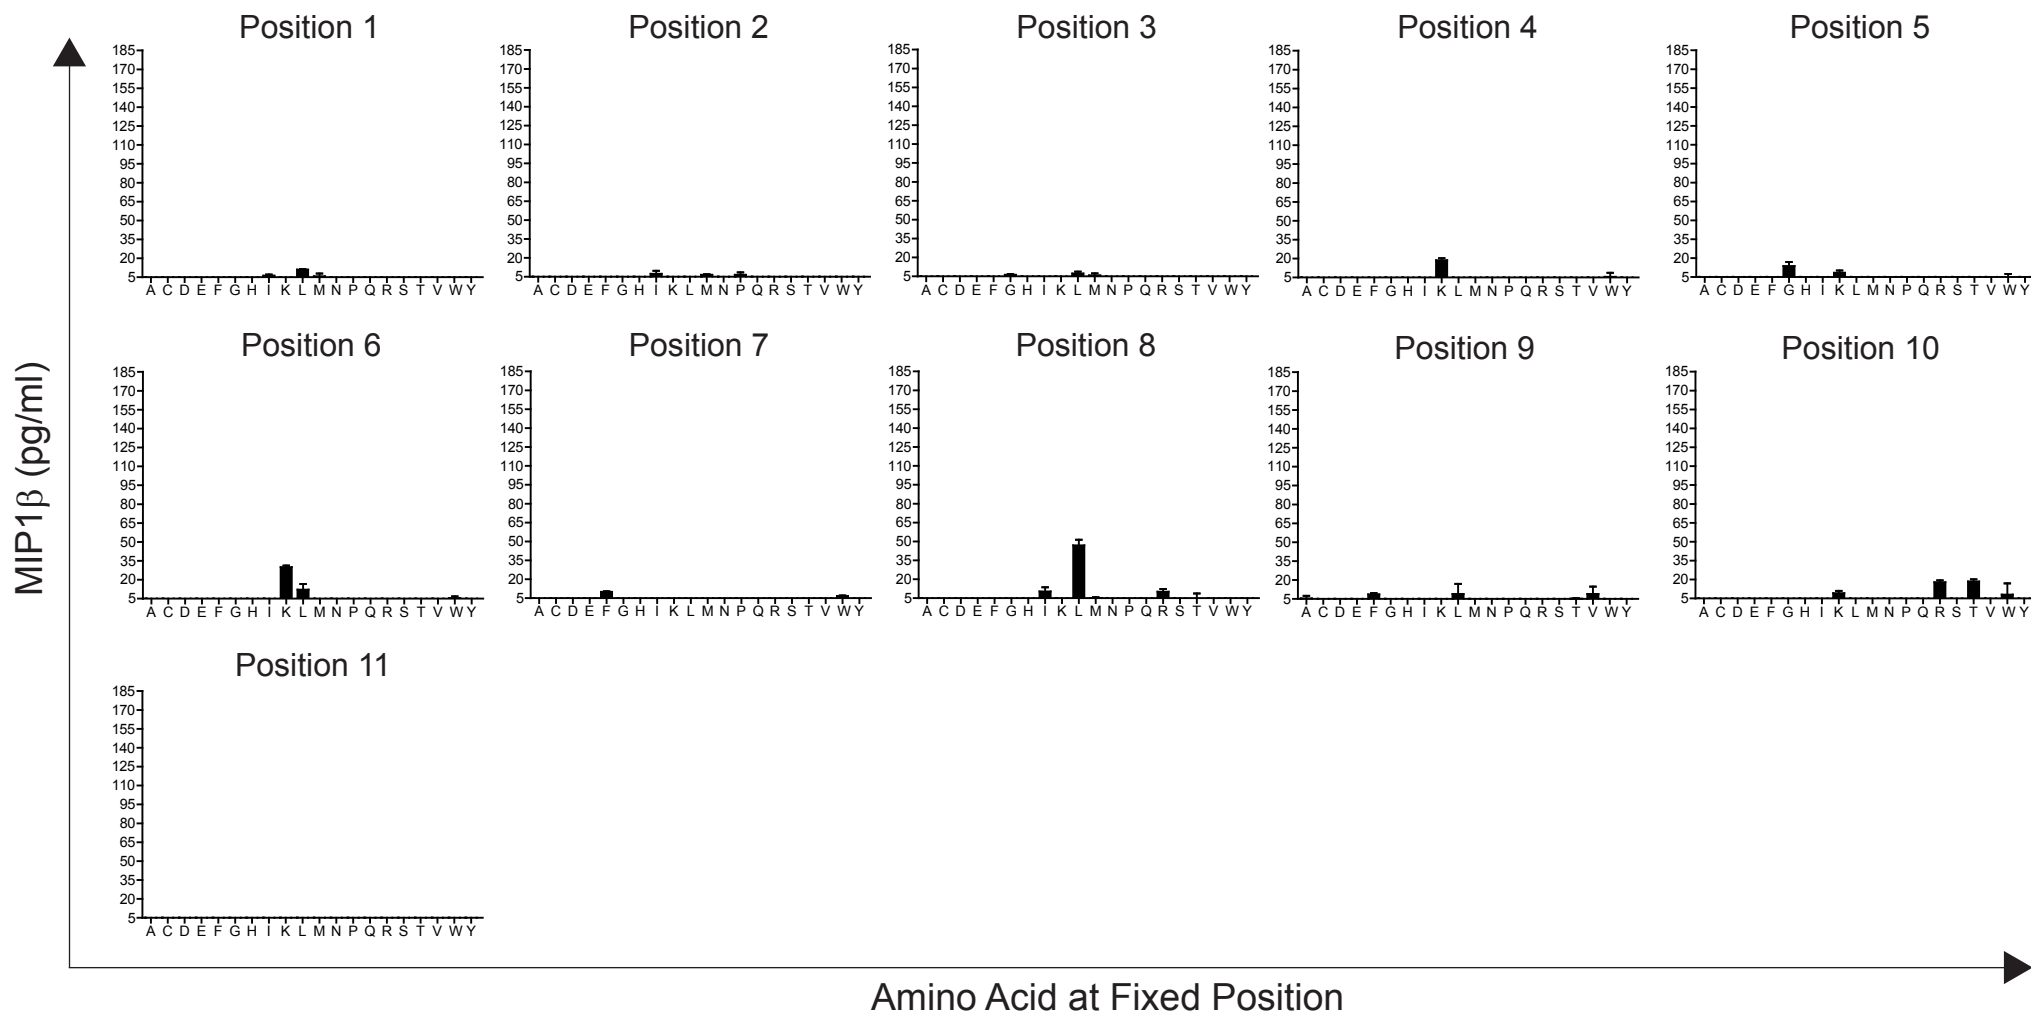

Figure S2E

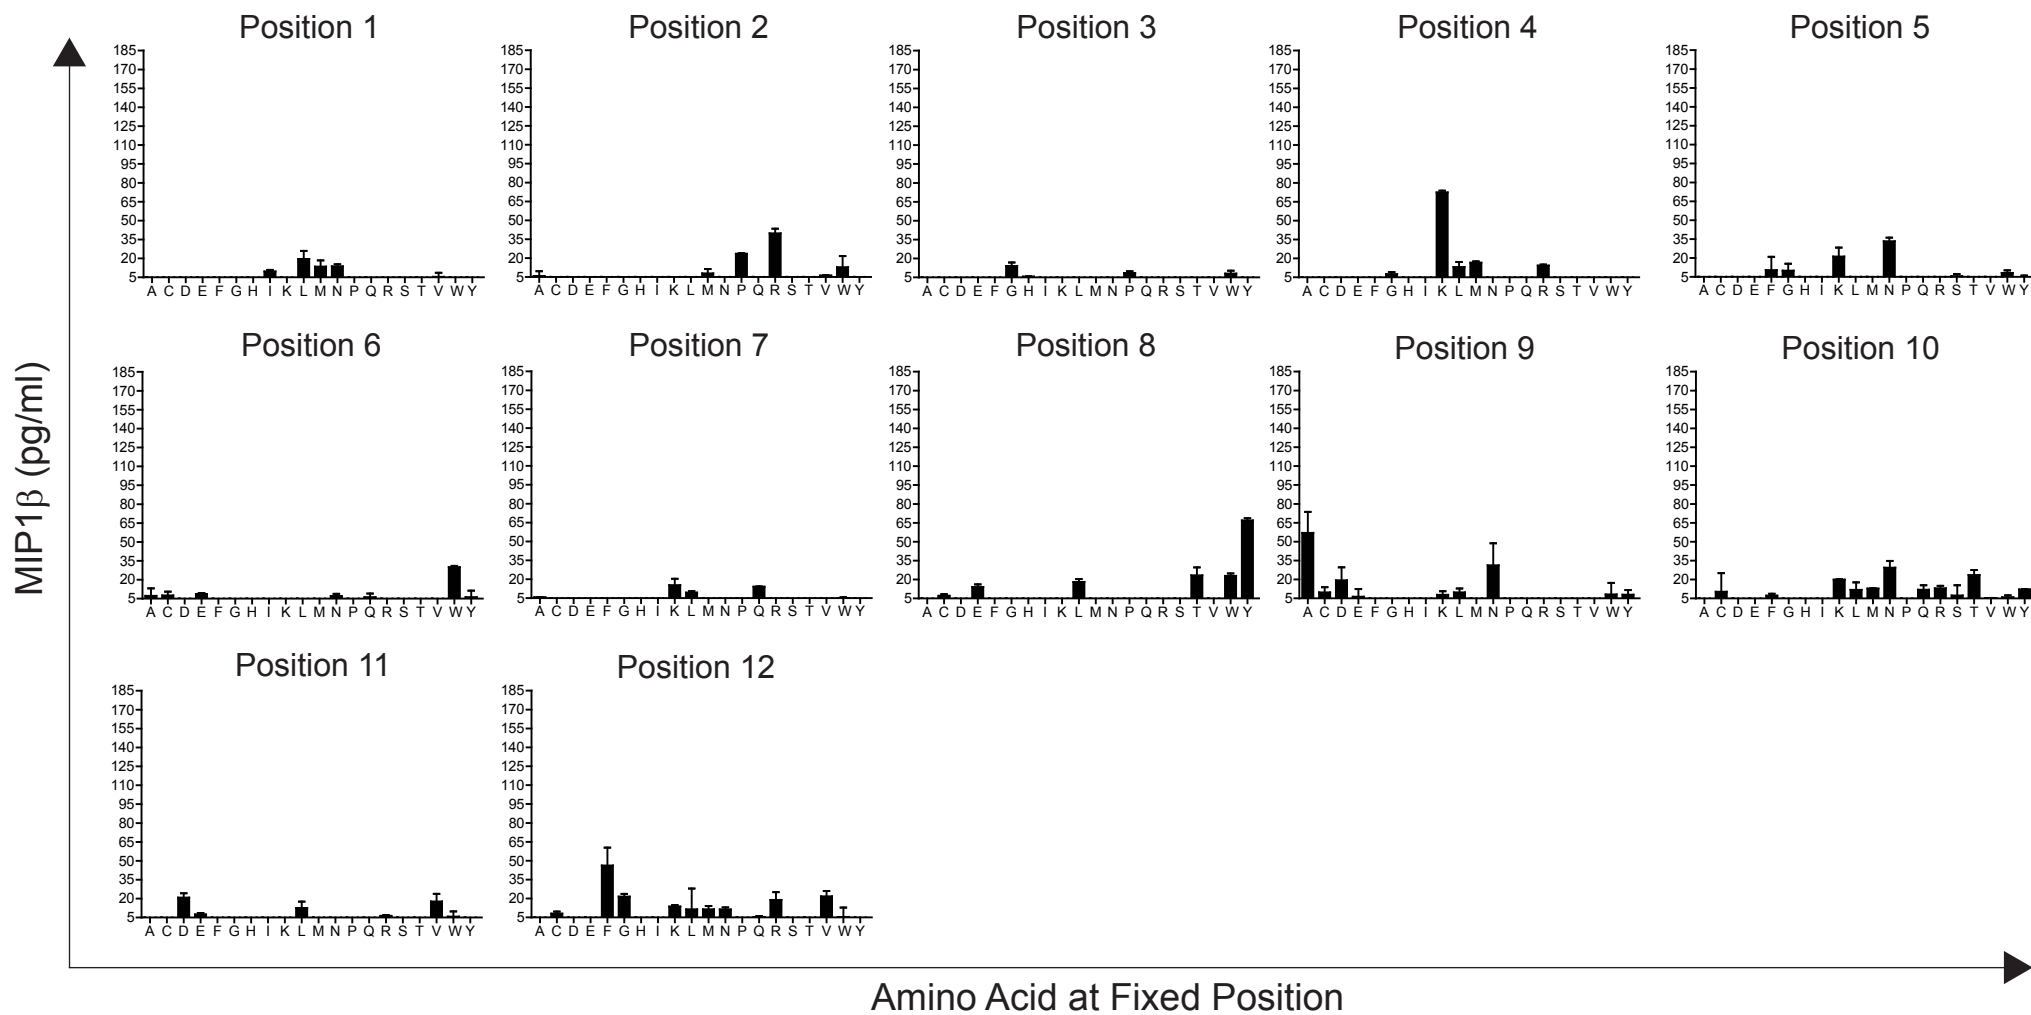

Figure S2F

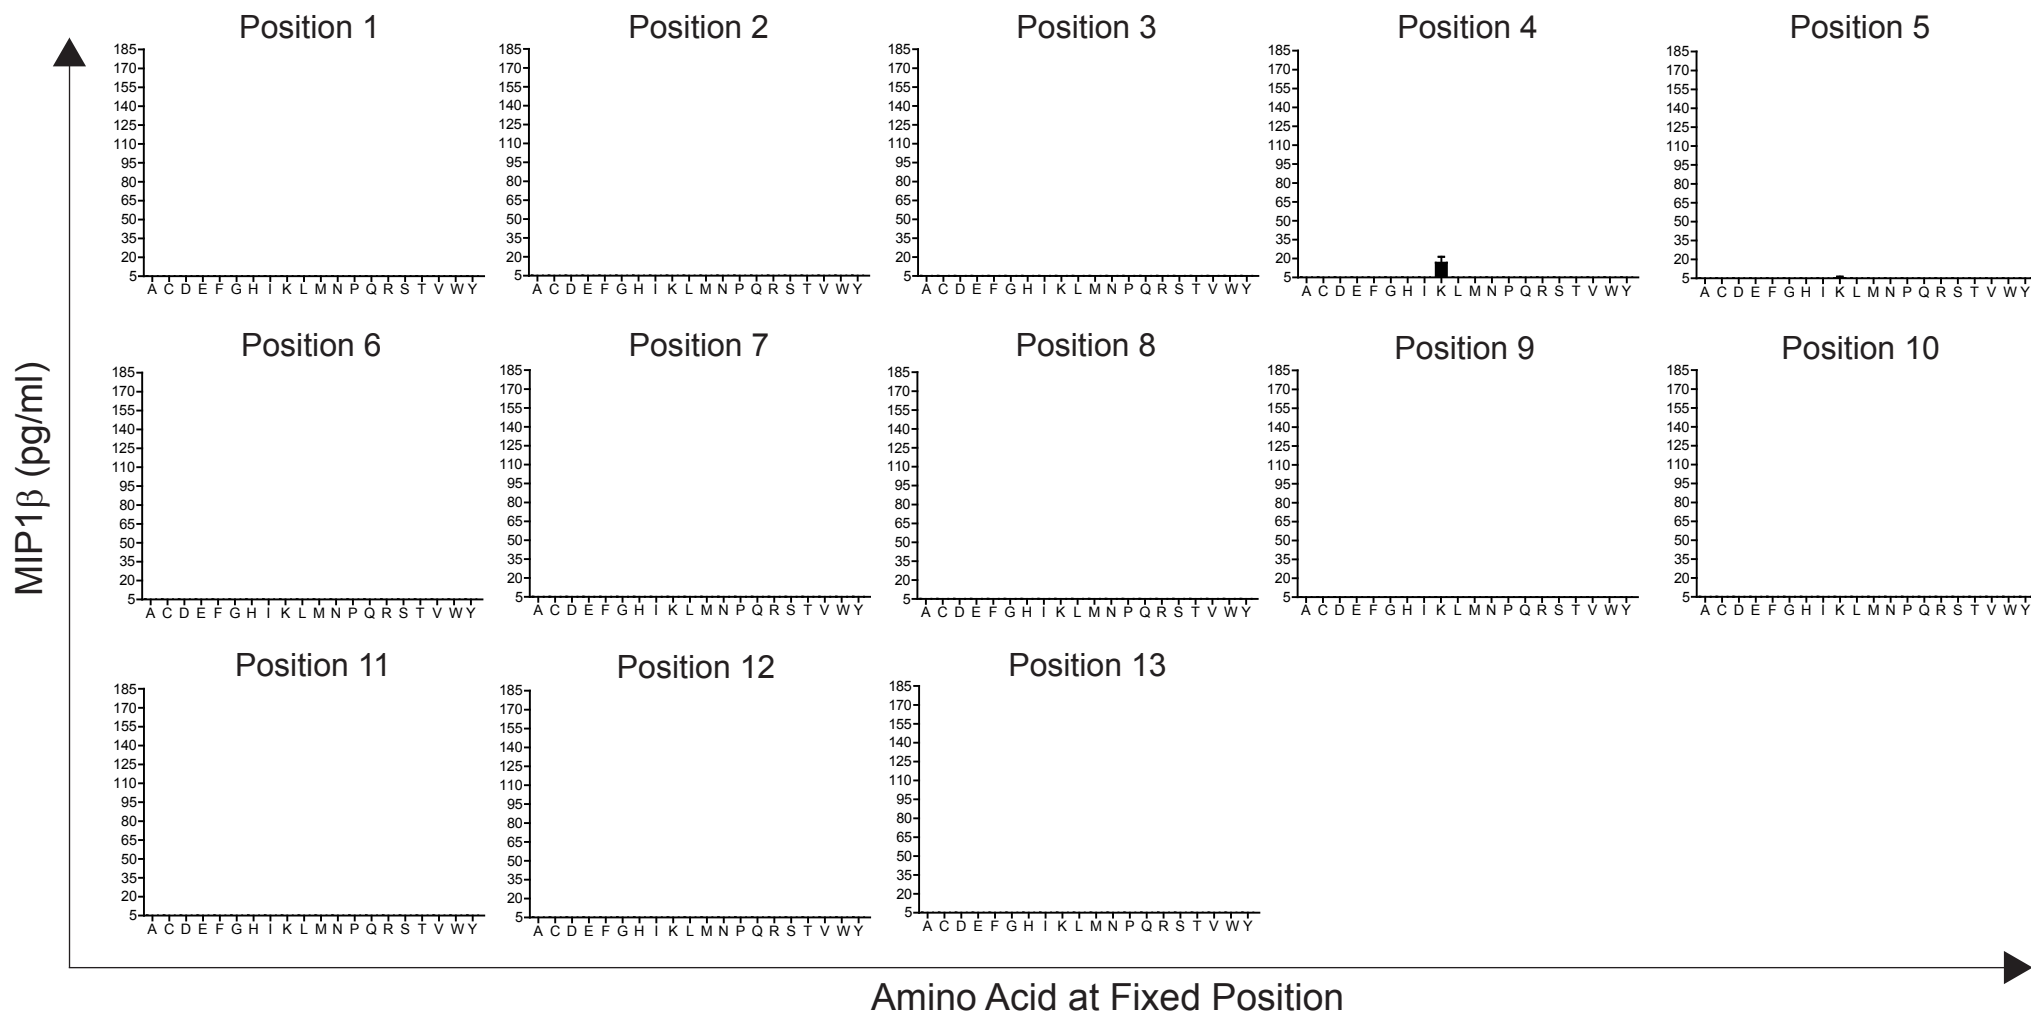

Figure S3A

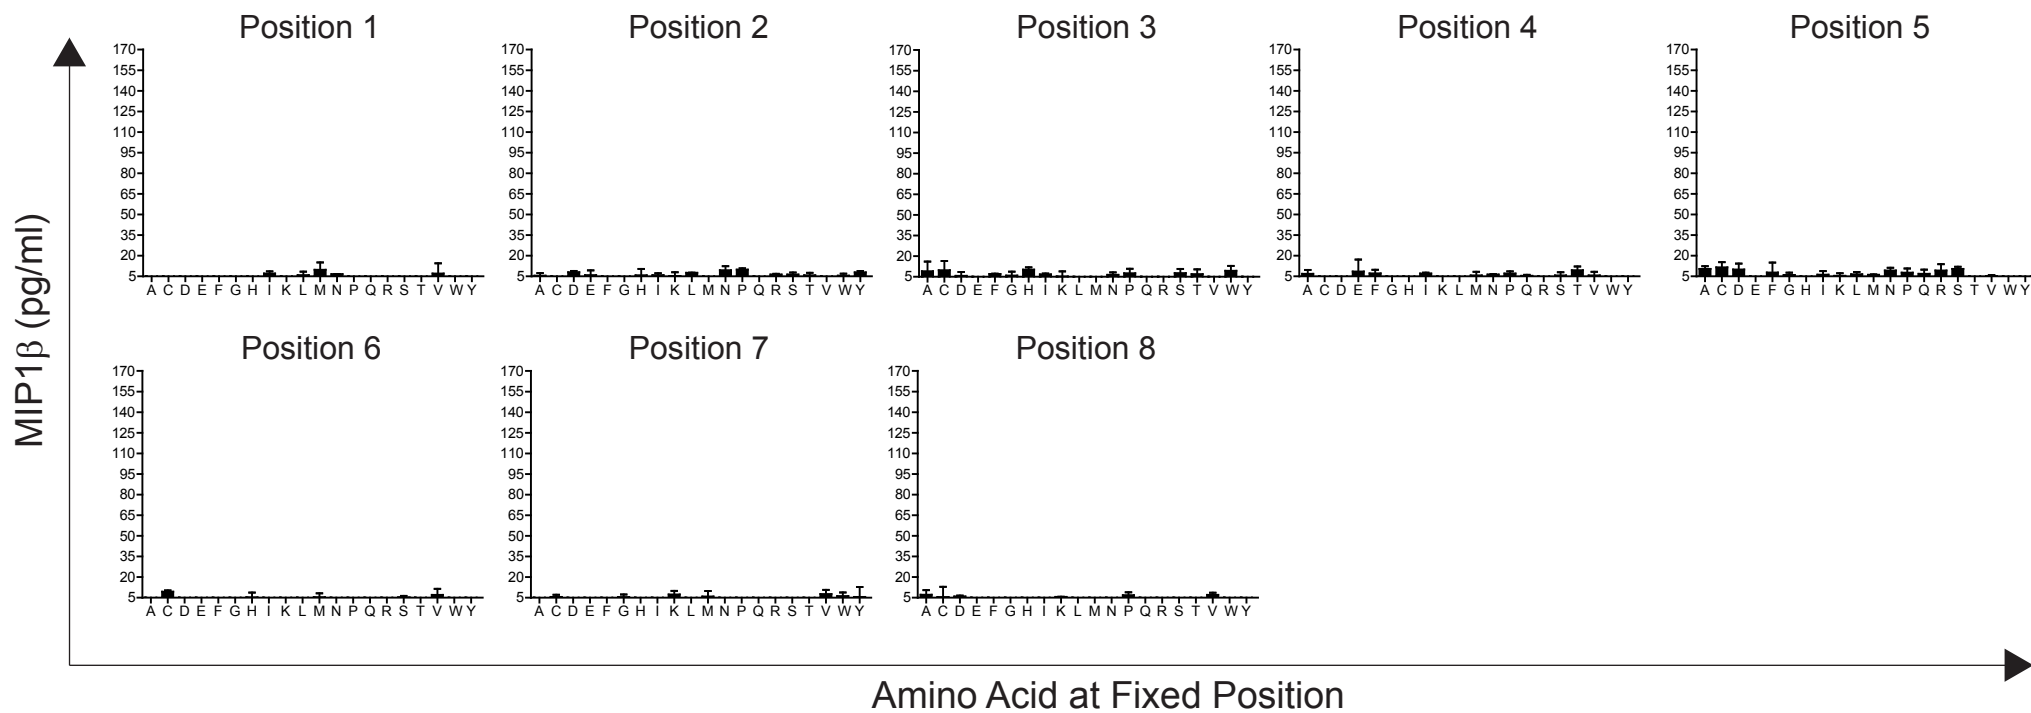

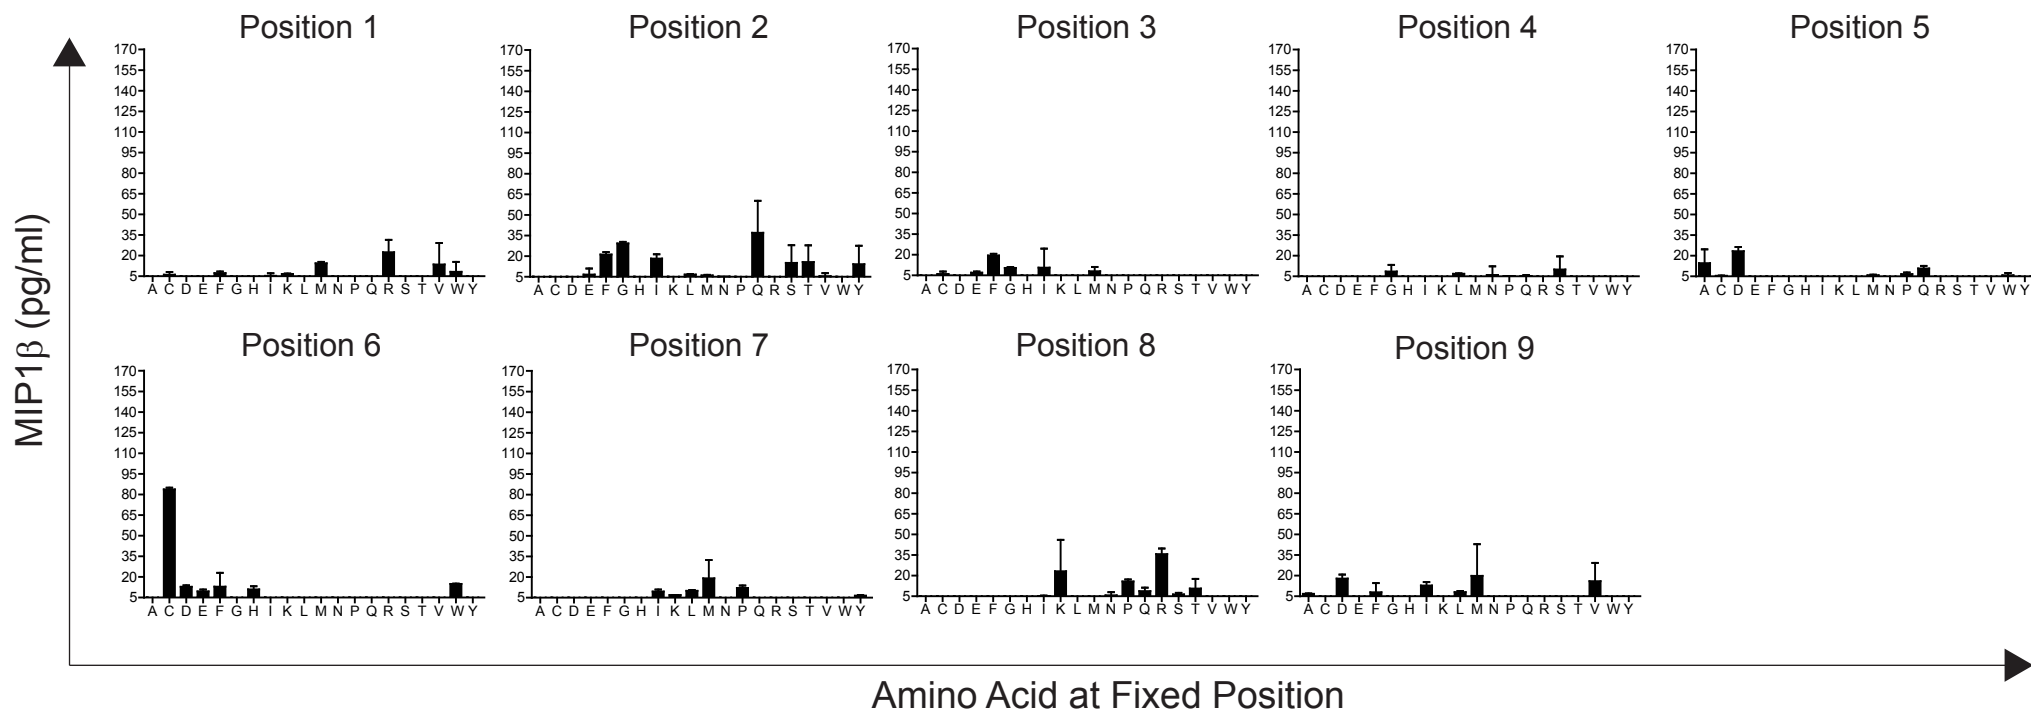

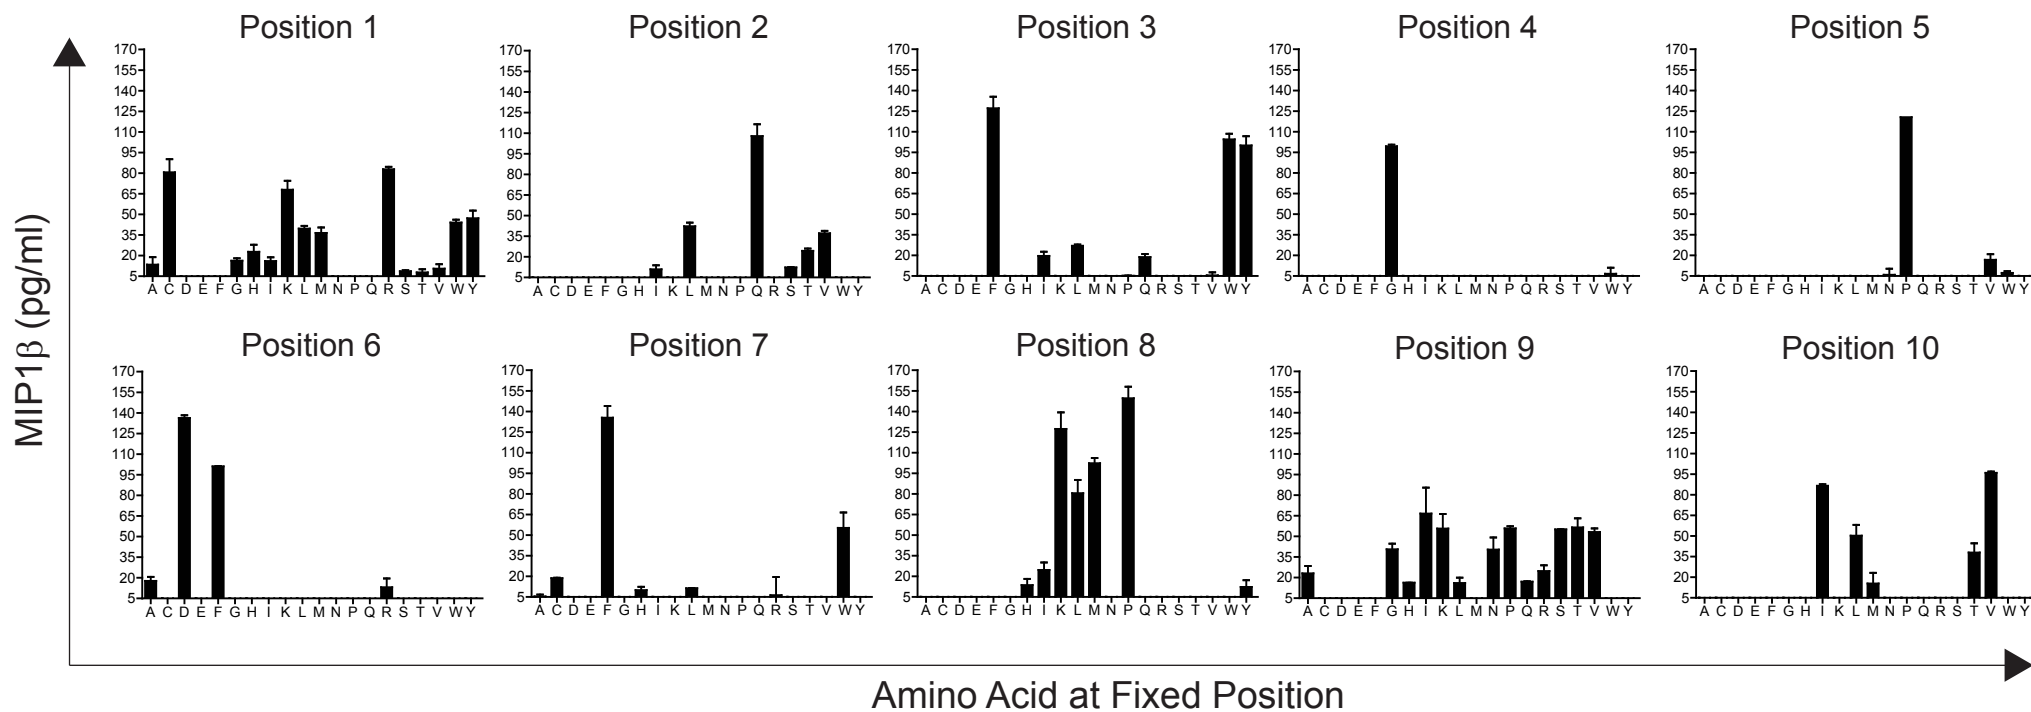

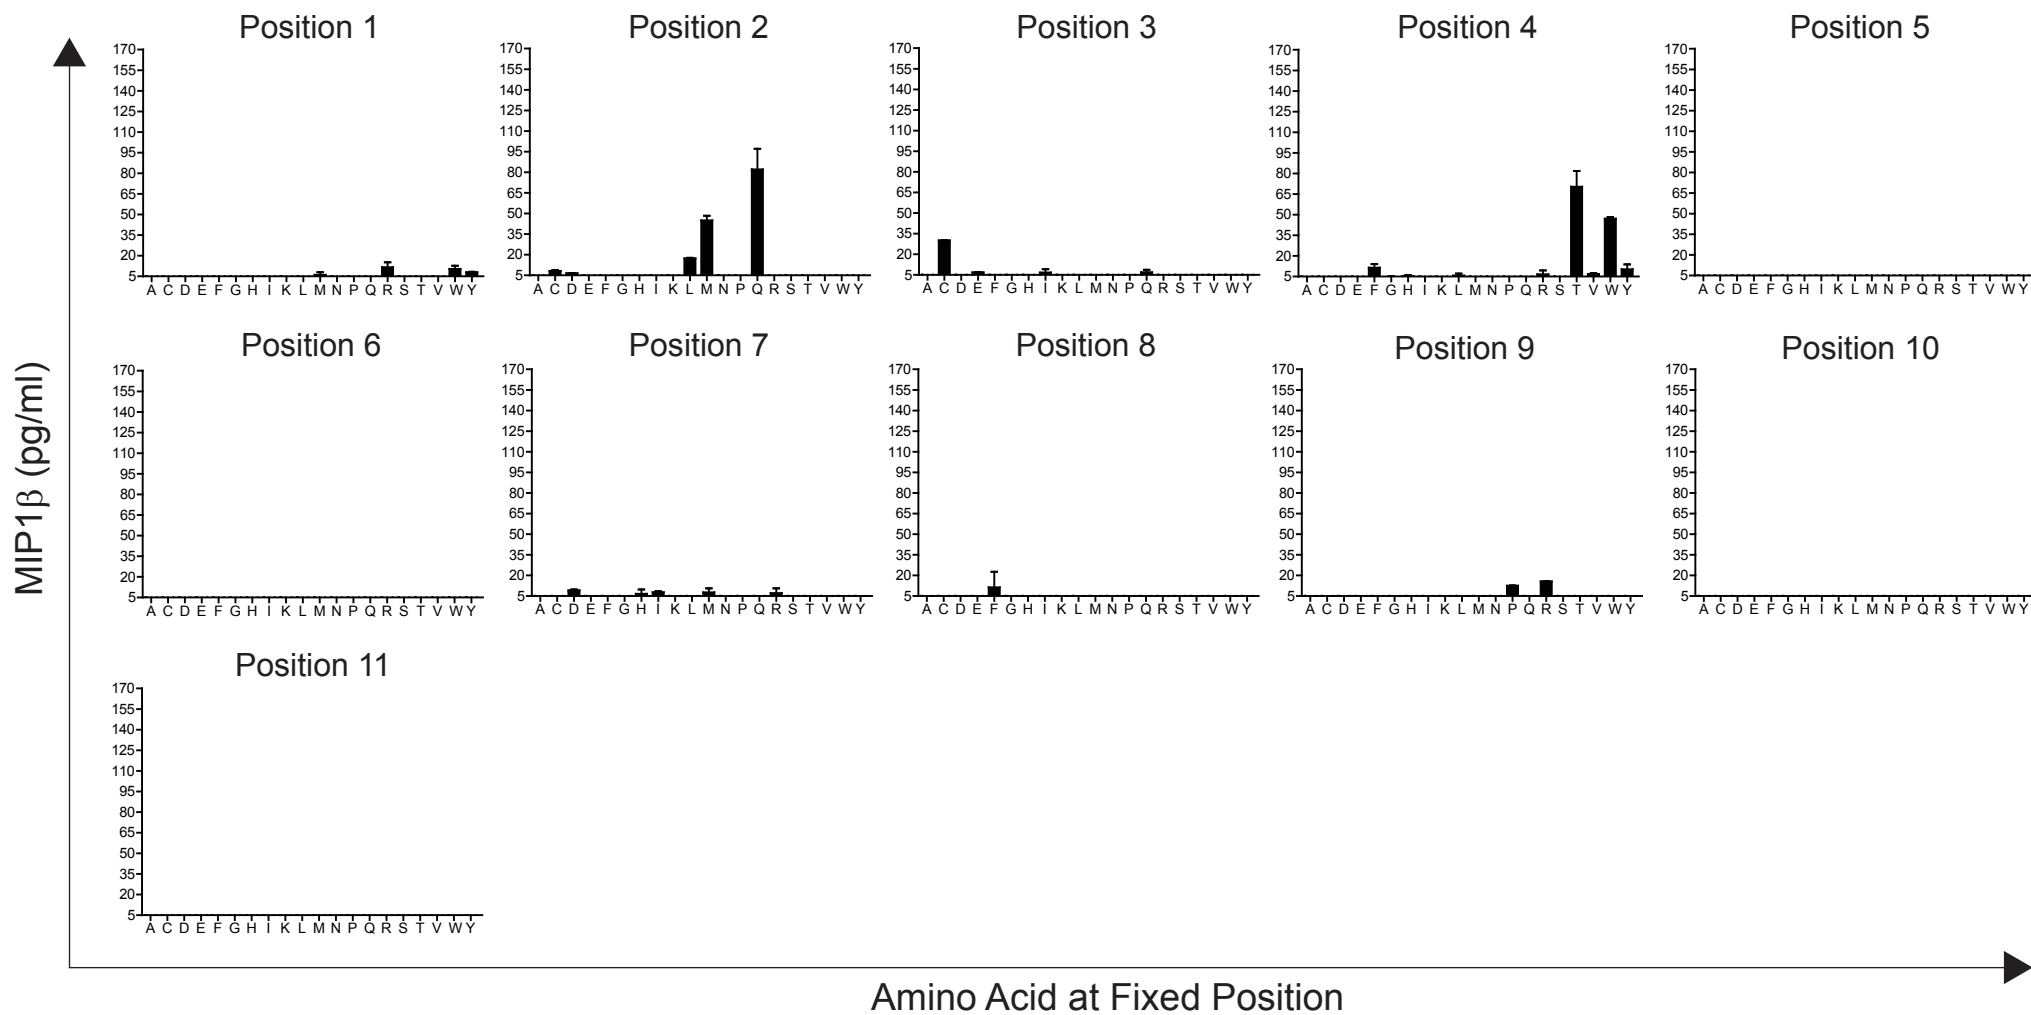

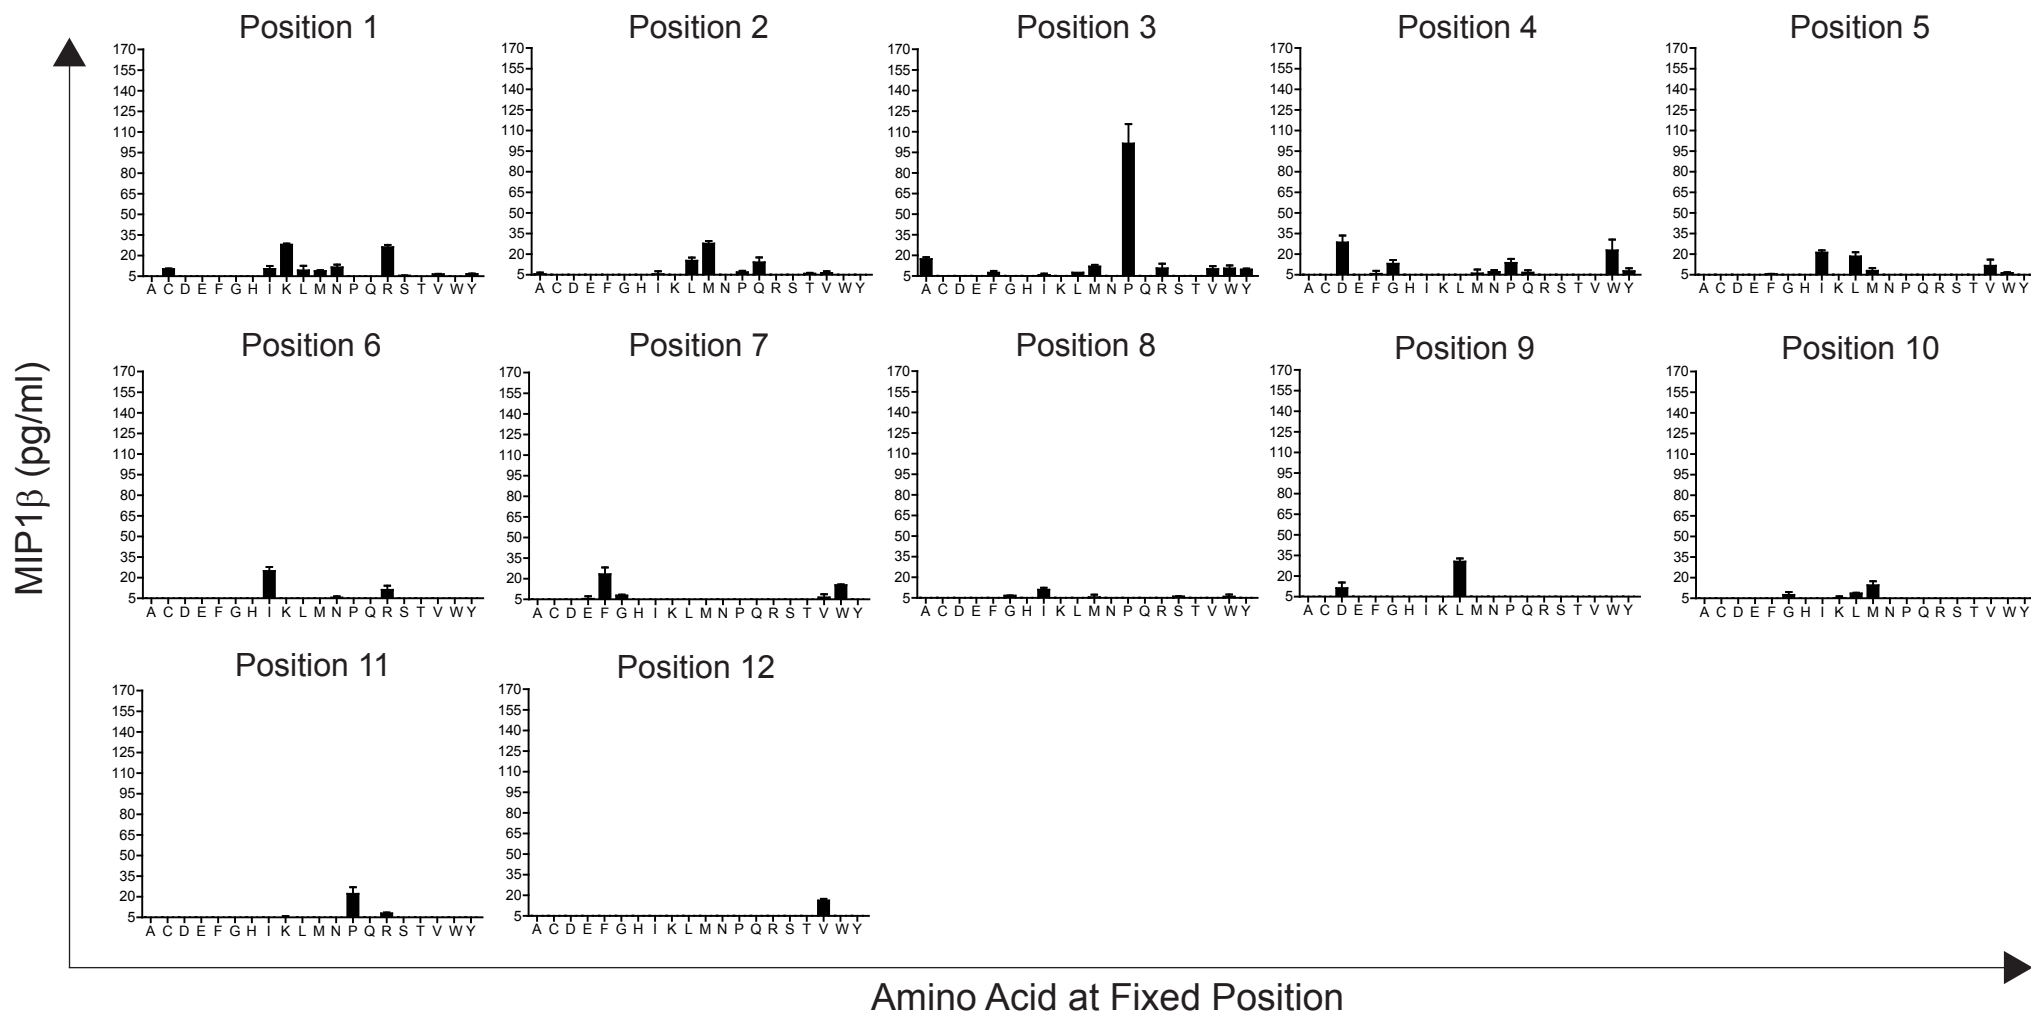



Figure S3F

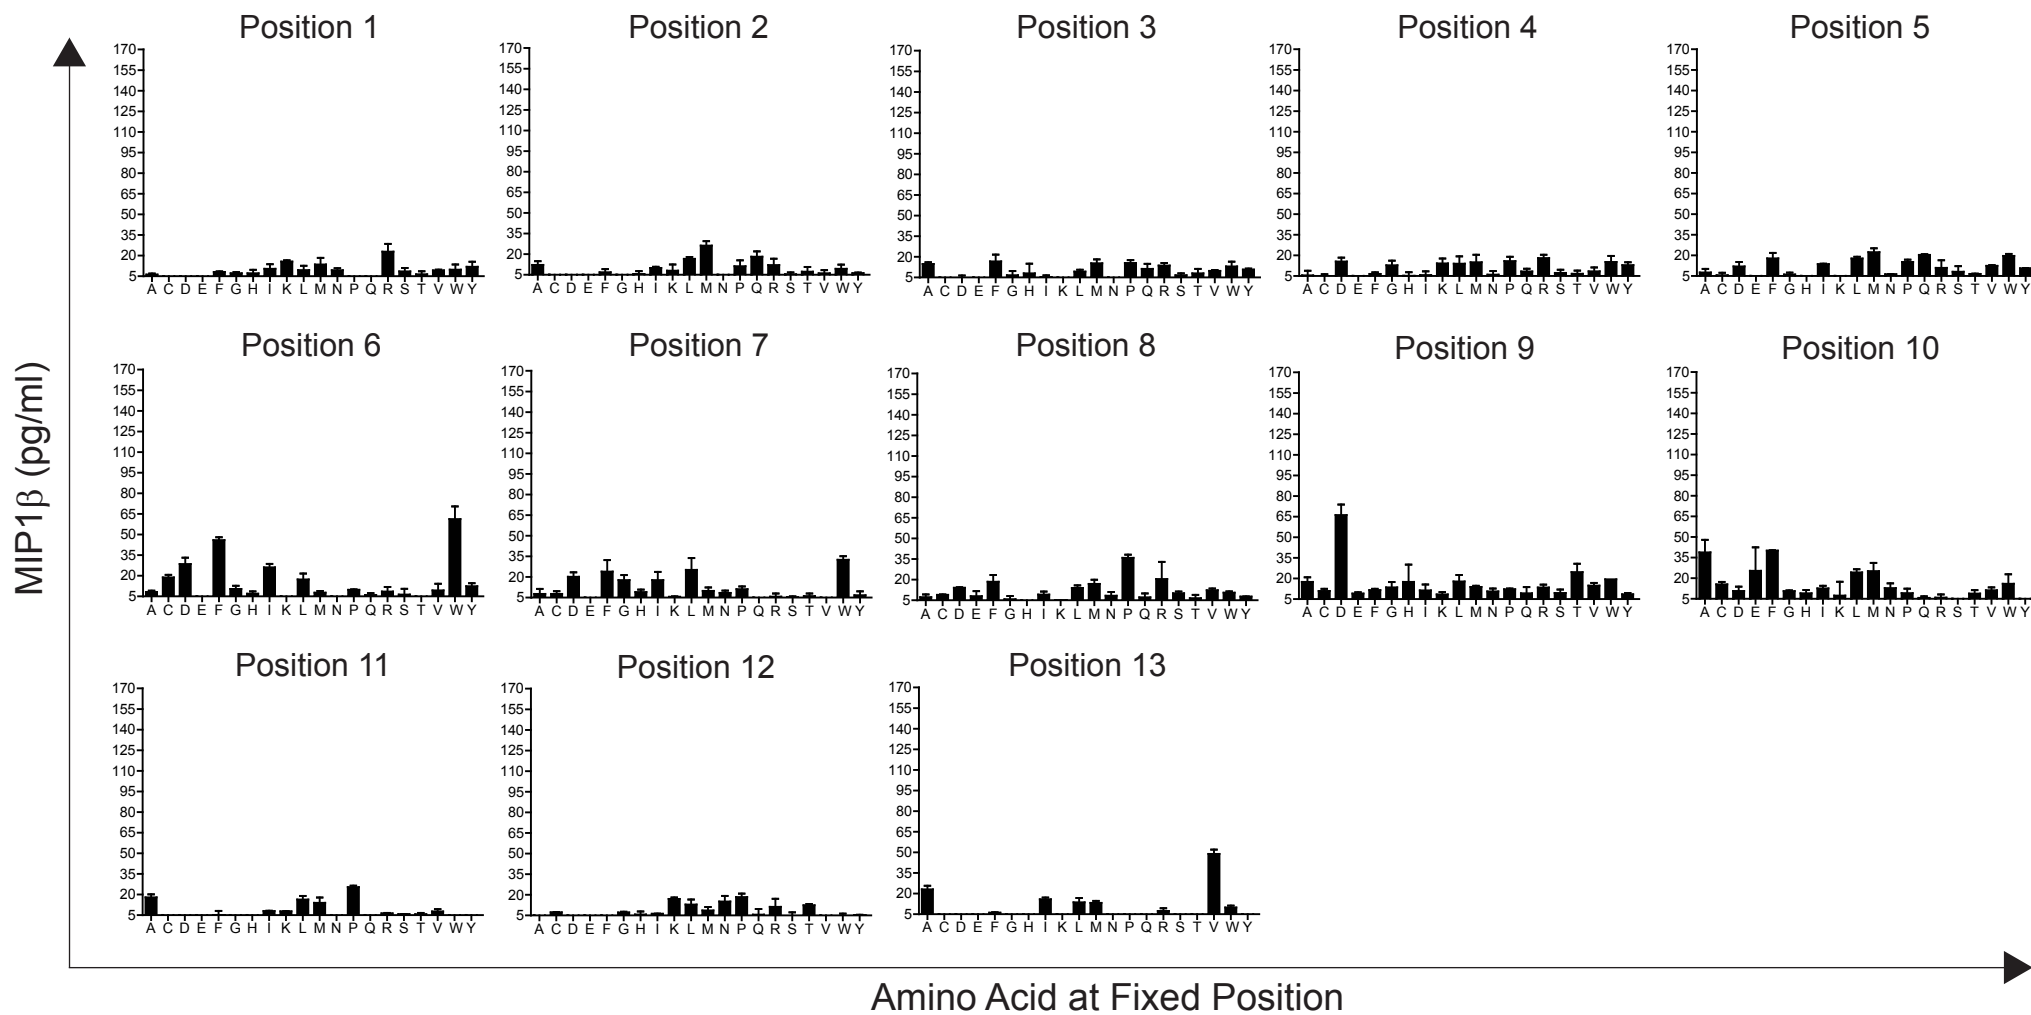

Figure S4A

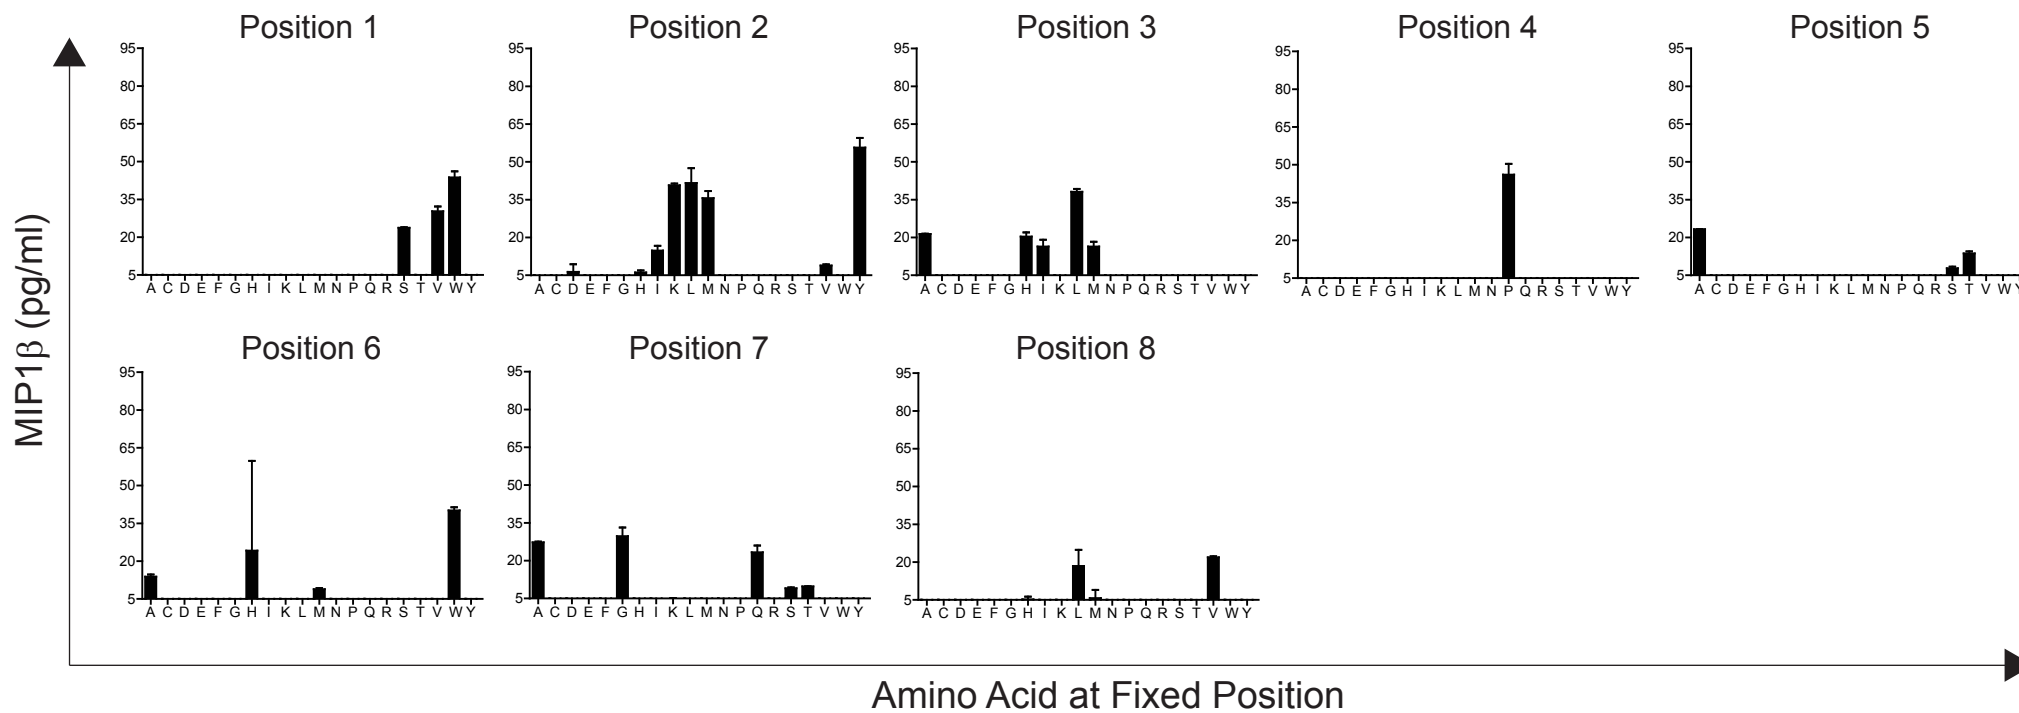

Figure S4B

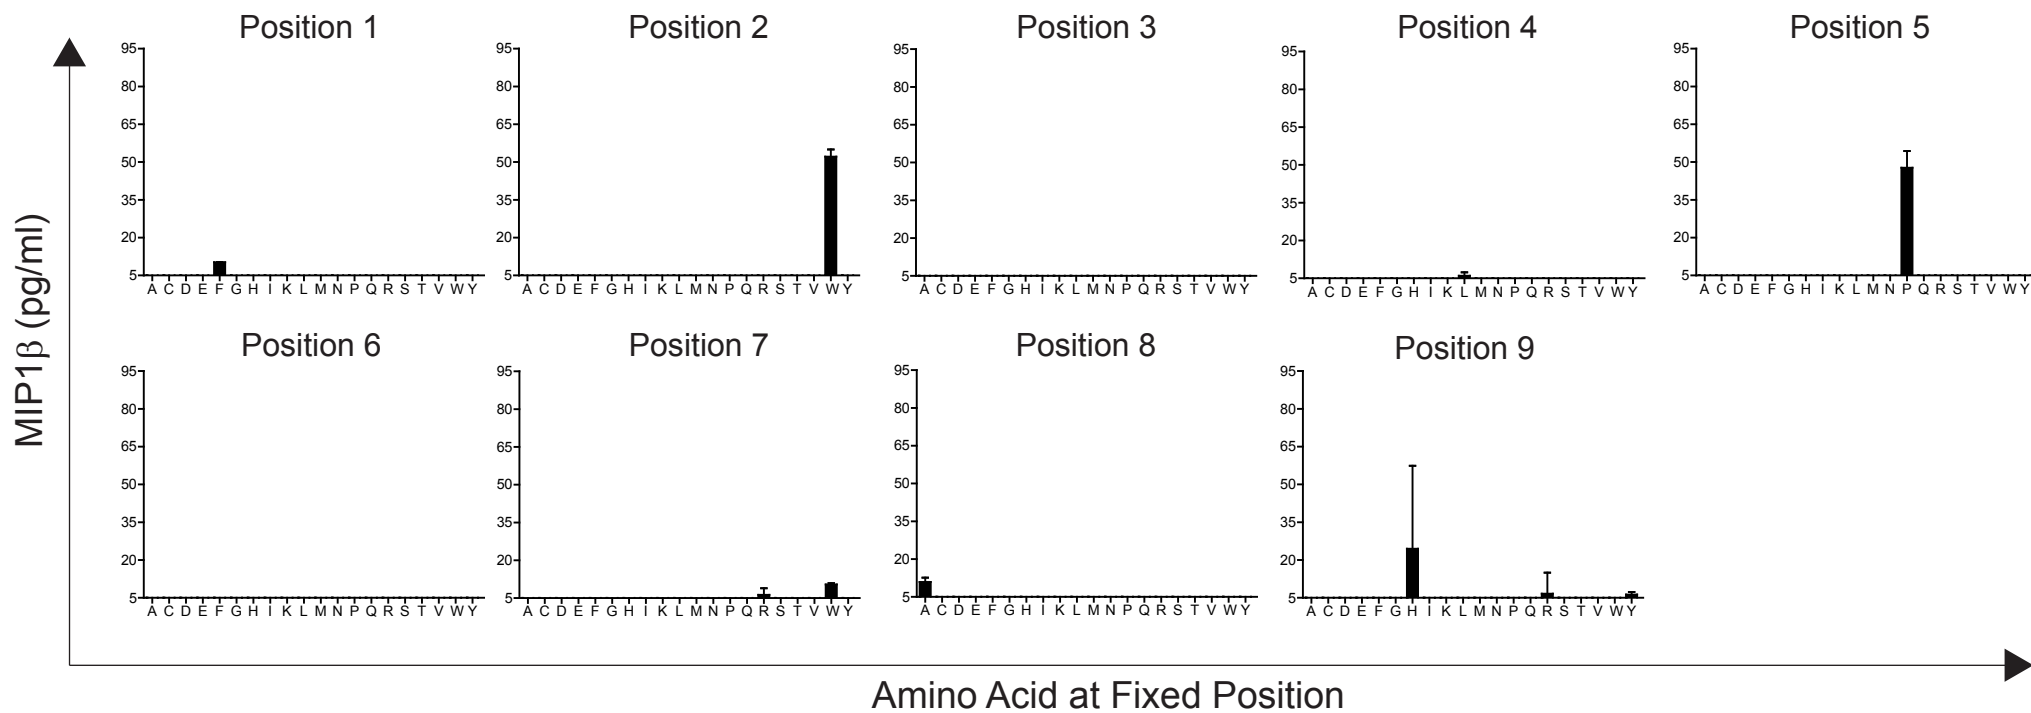

Figure S4C

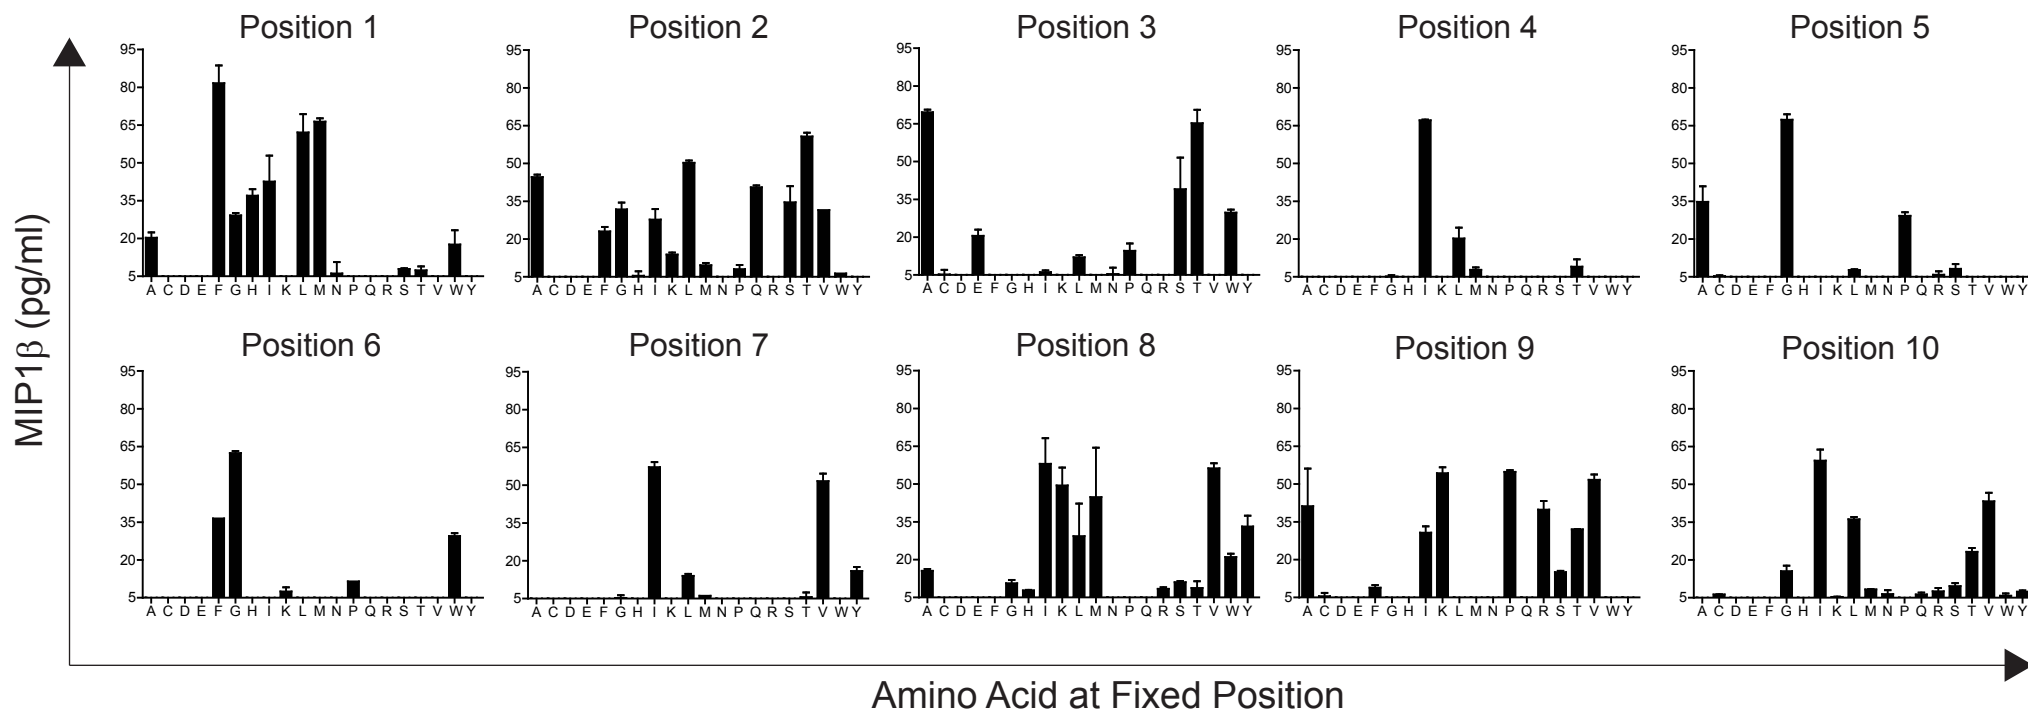

Figure S4D

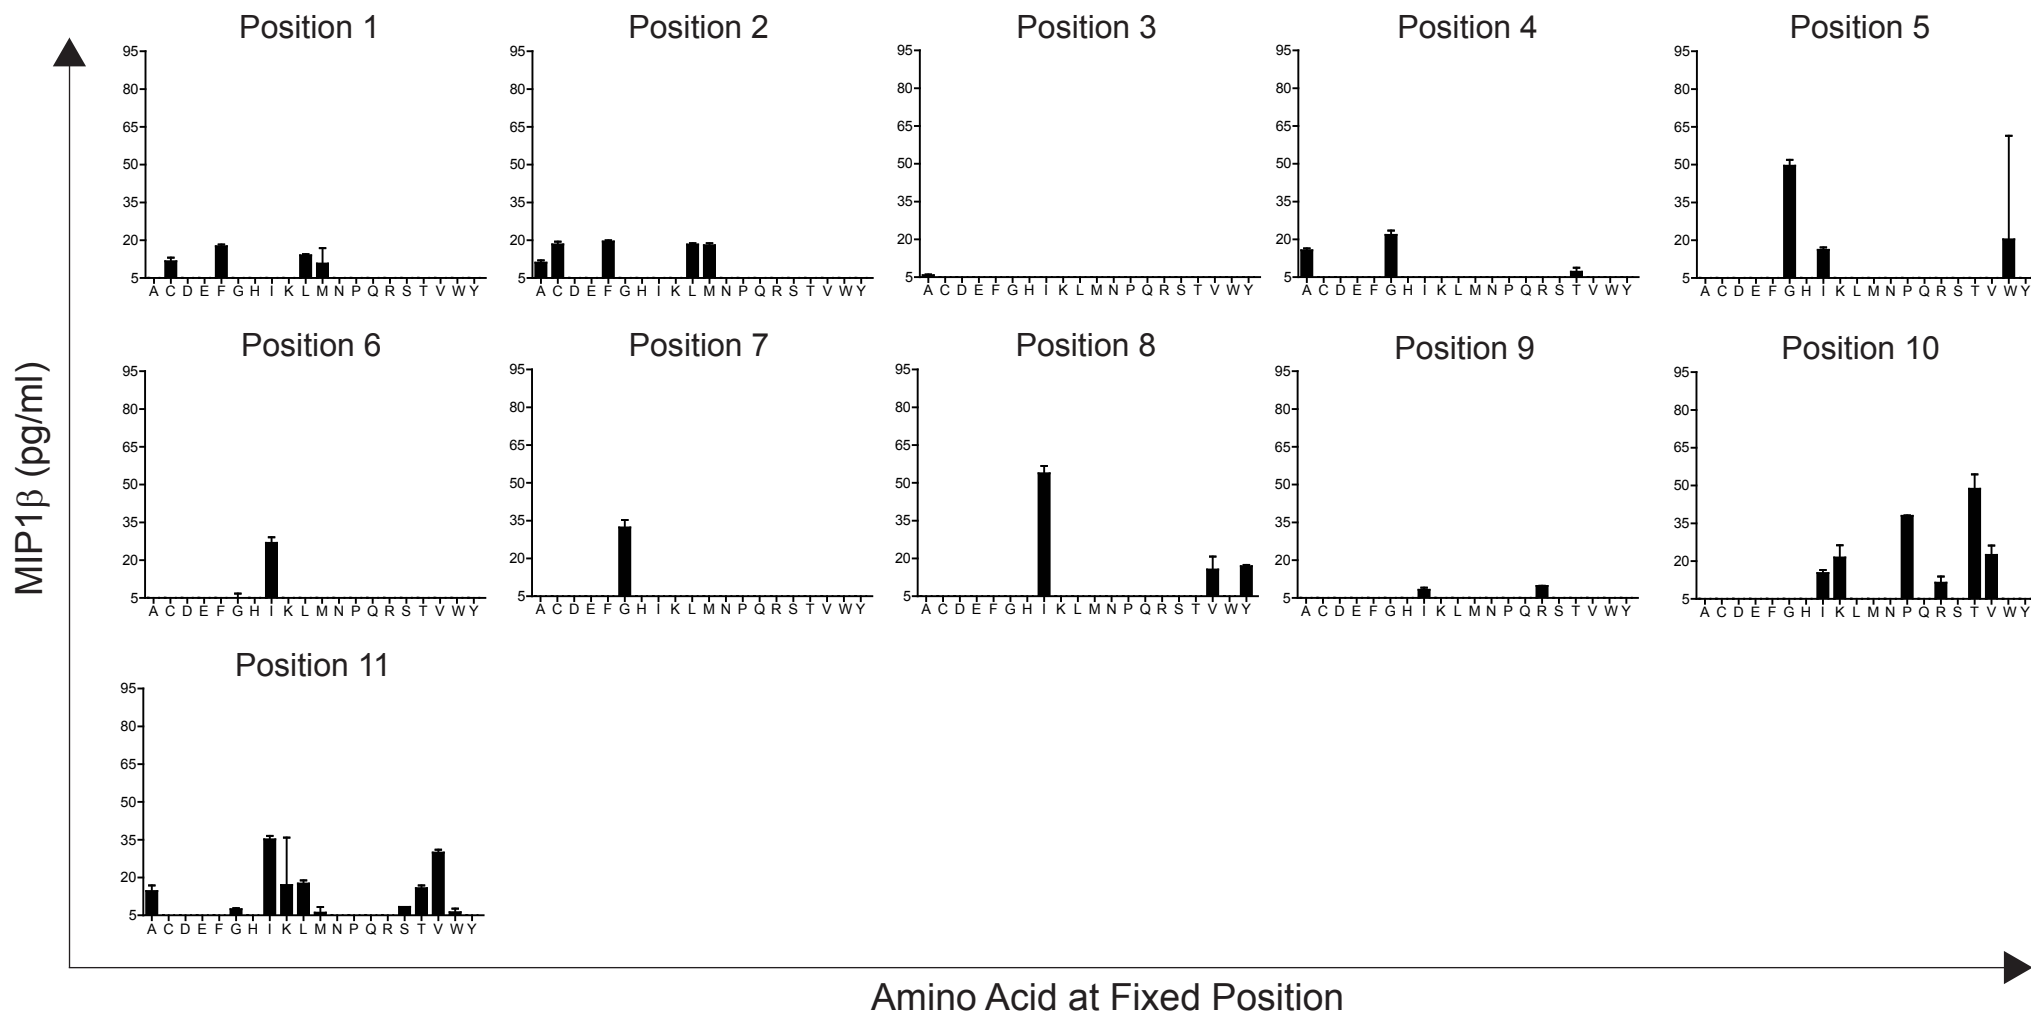

Figure S4E

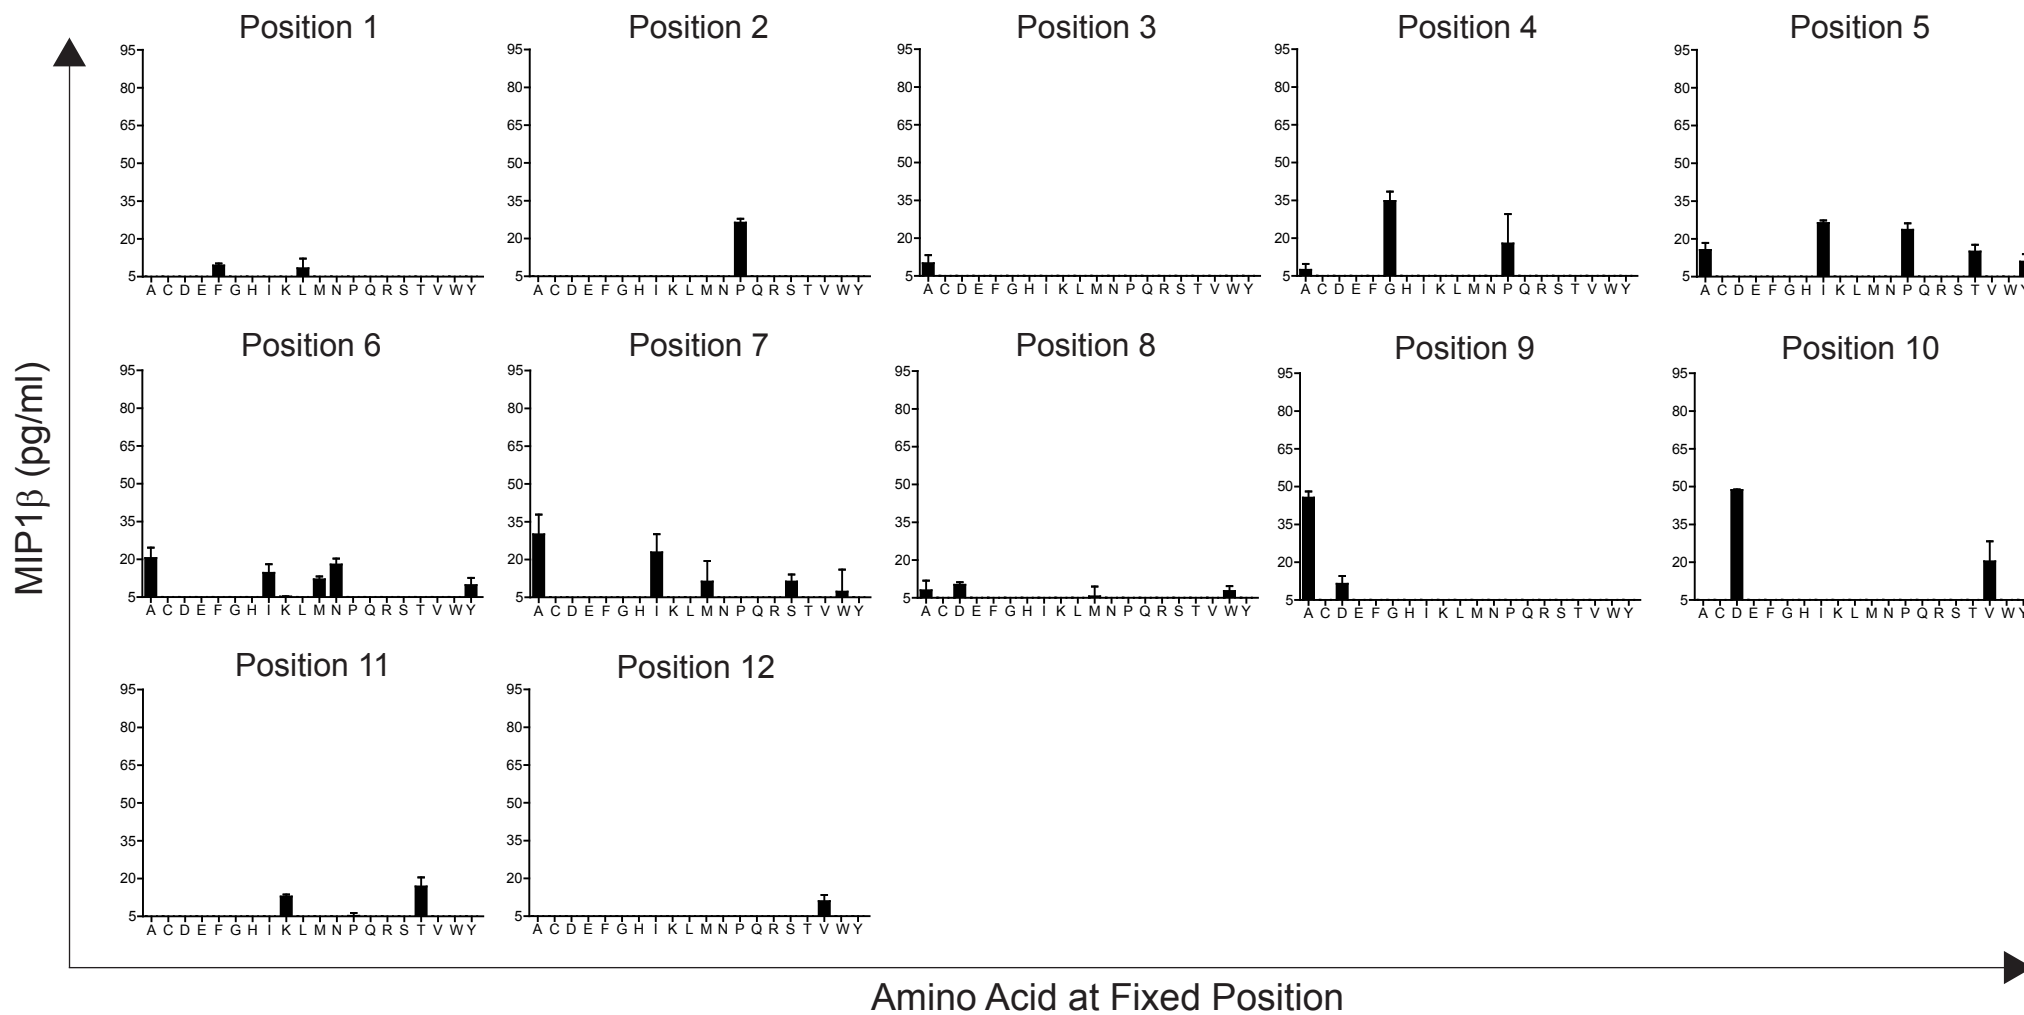

Figure S4F

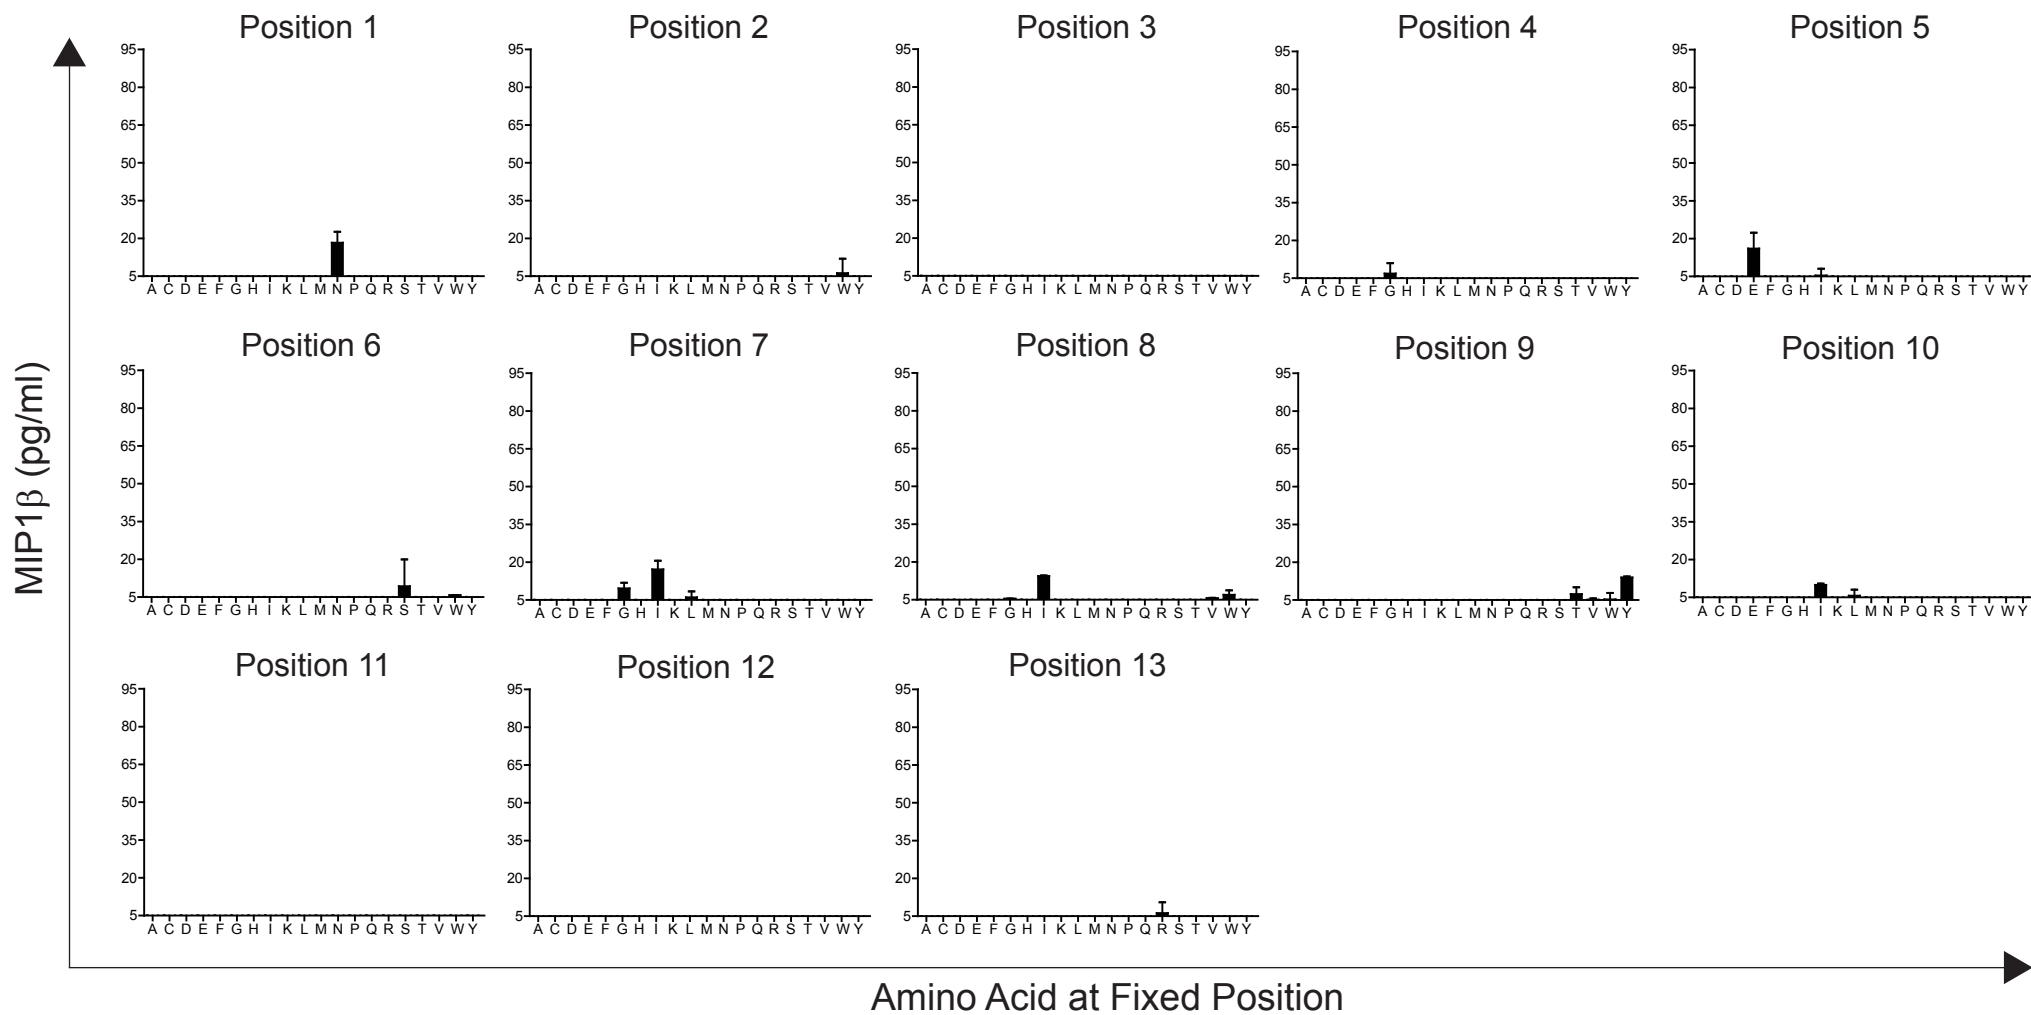

Figure S5A

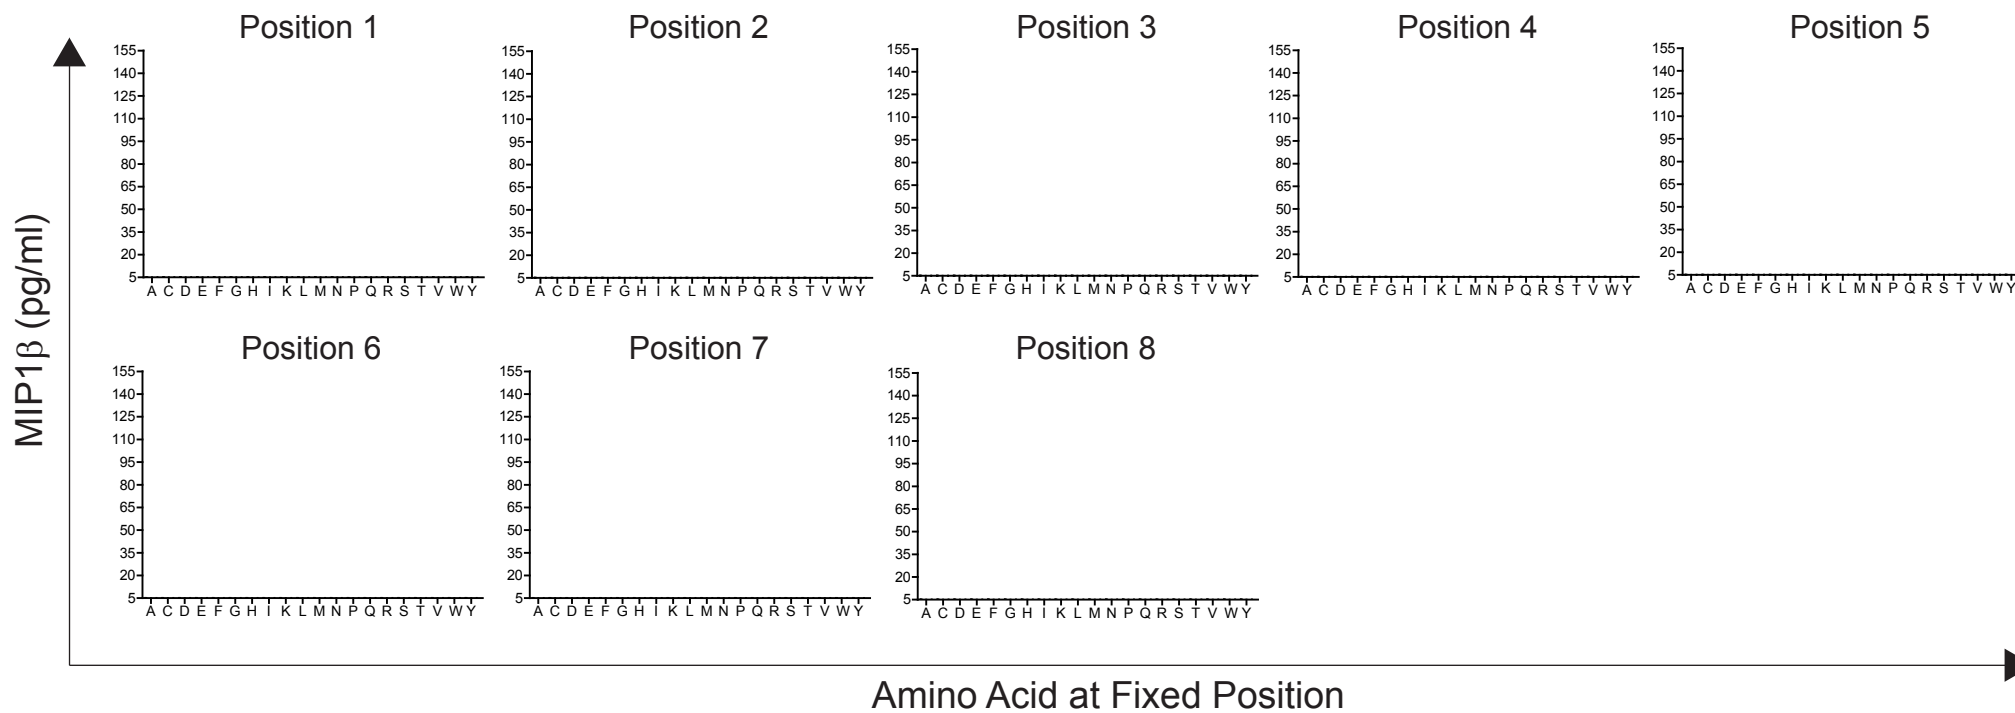



Figure S5B

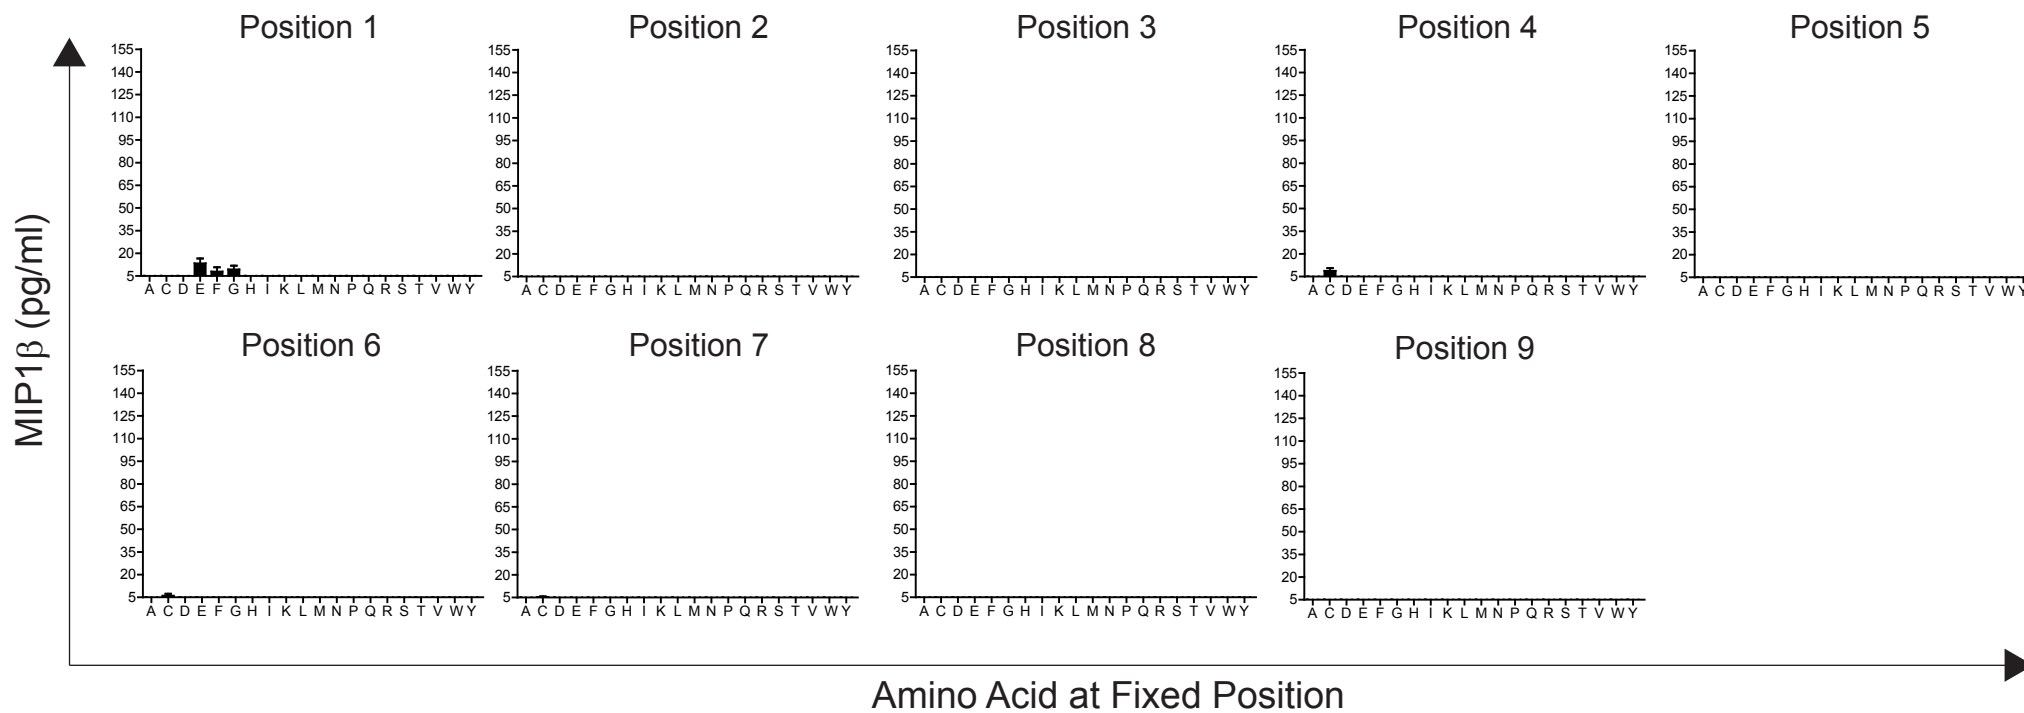

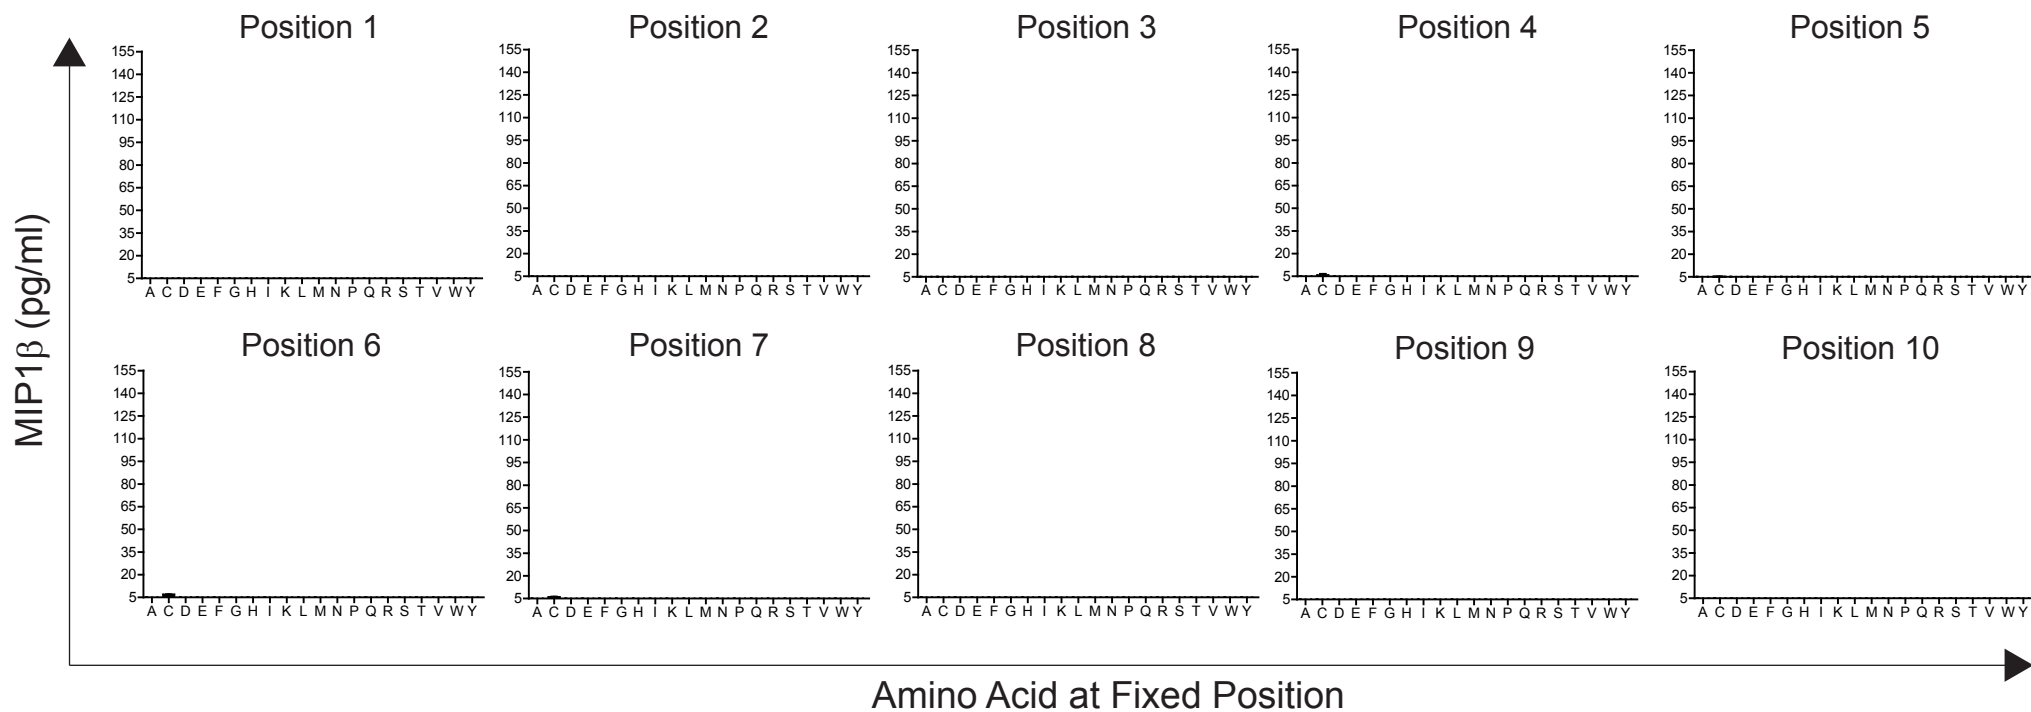

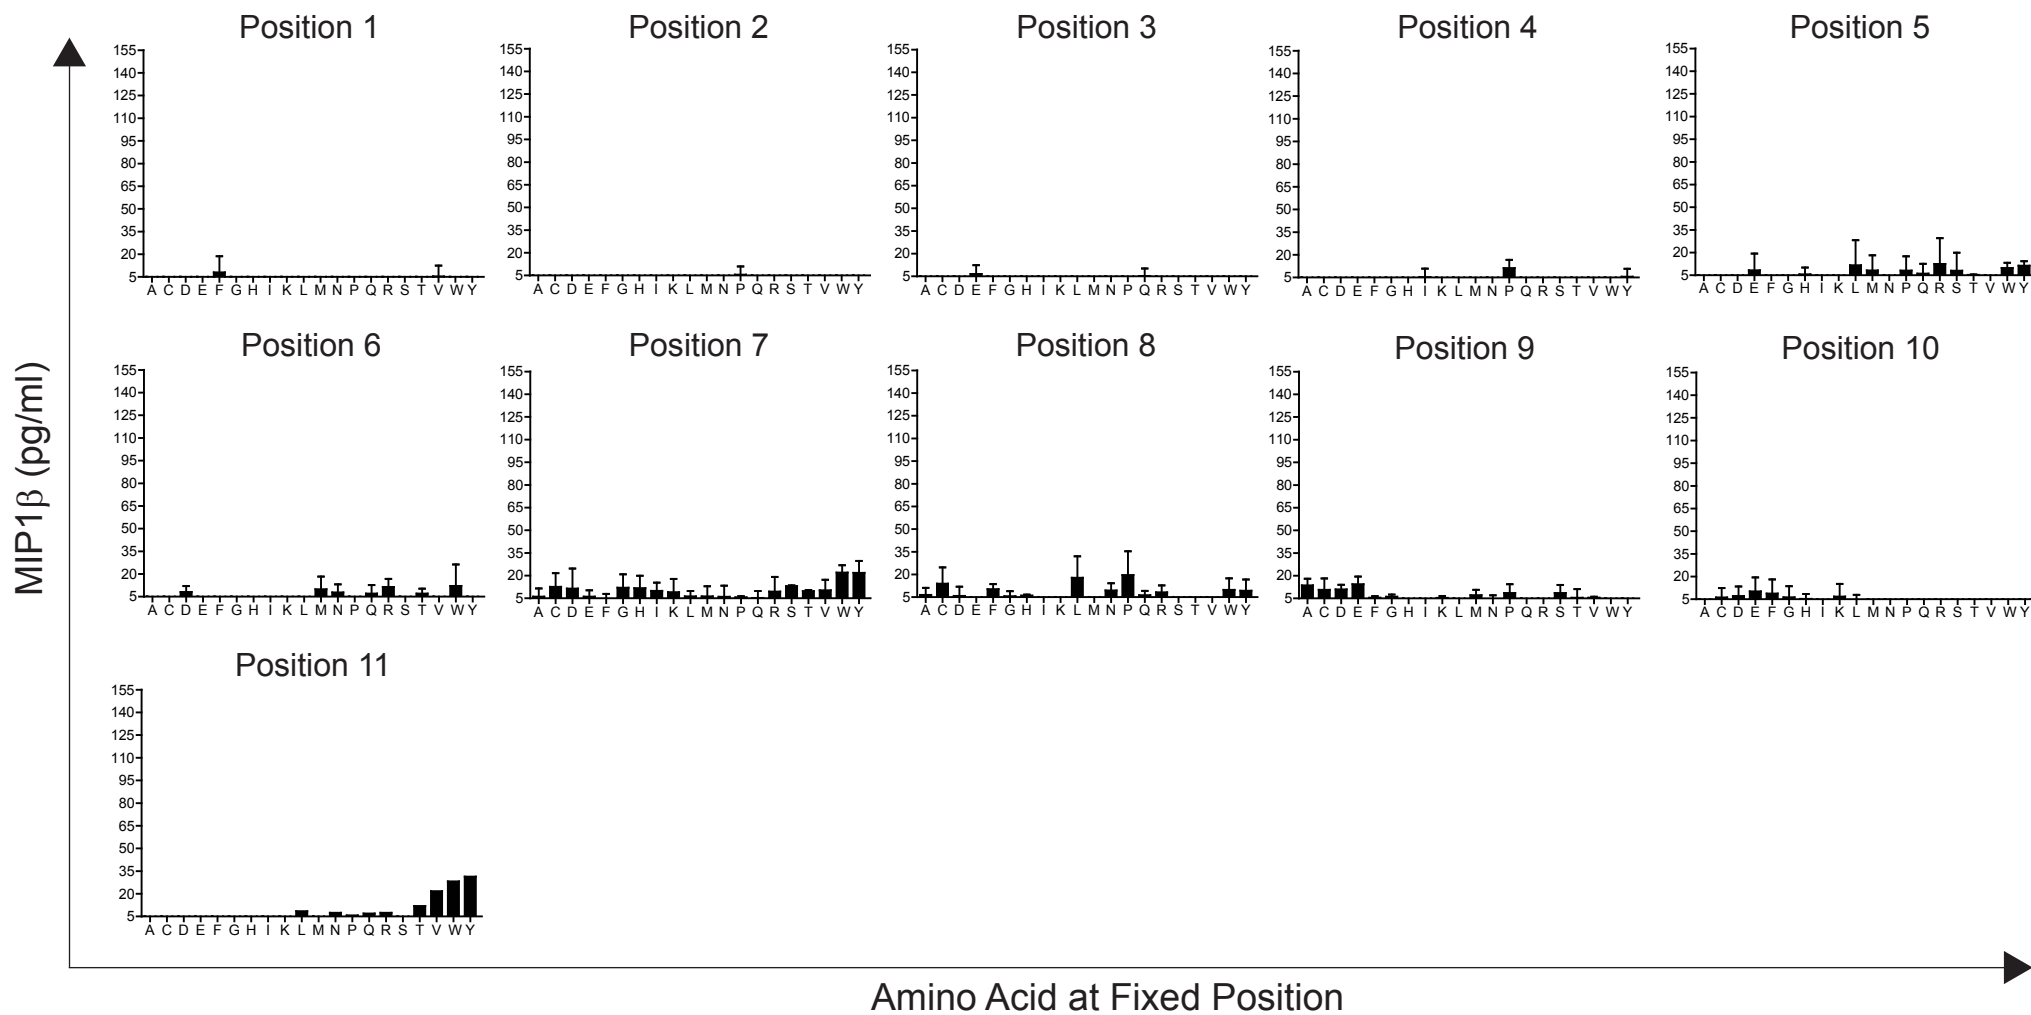

Figure S5E

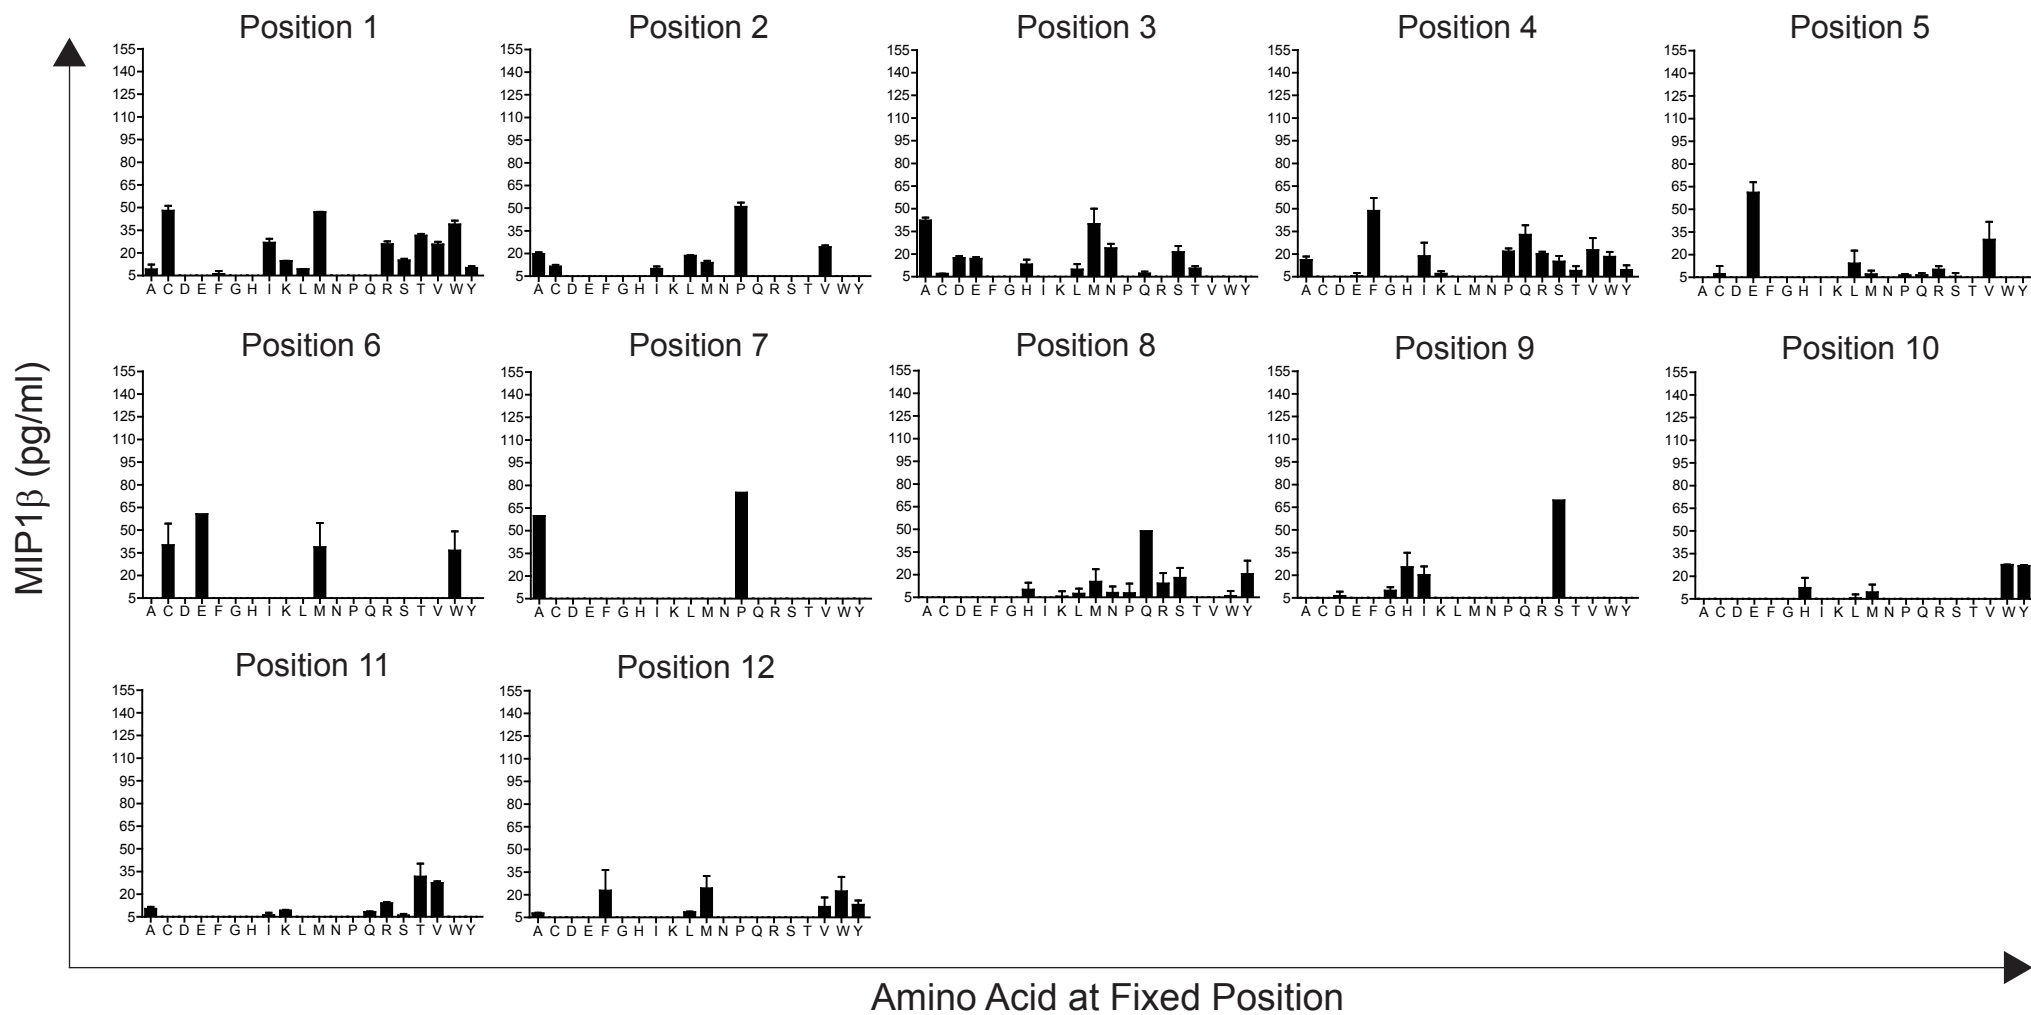

Figure S5F

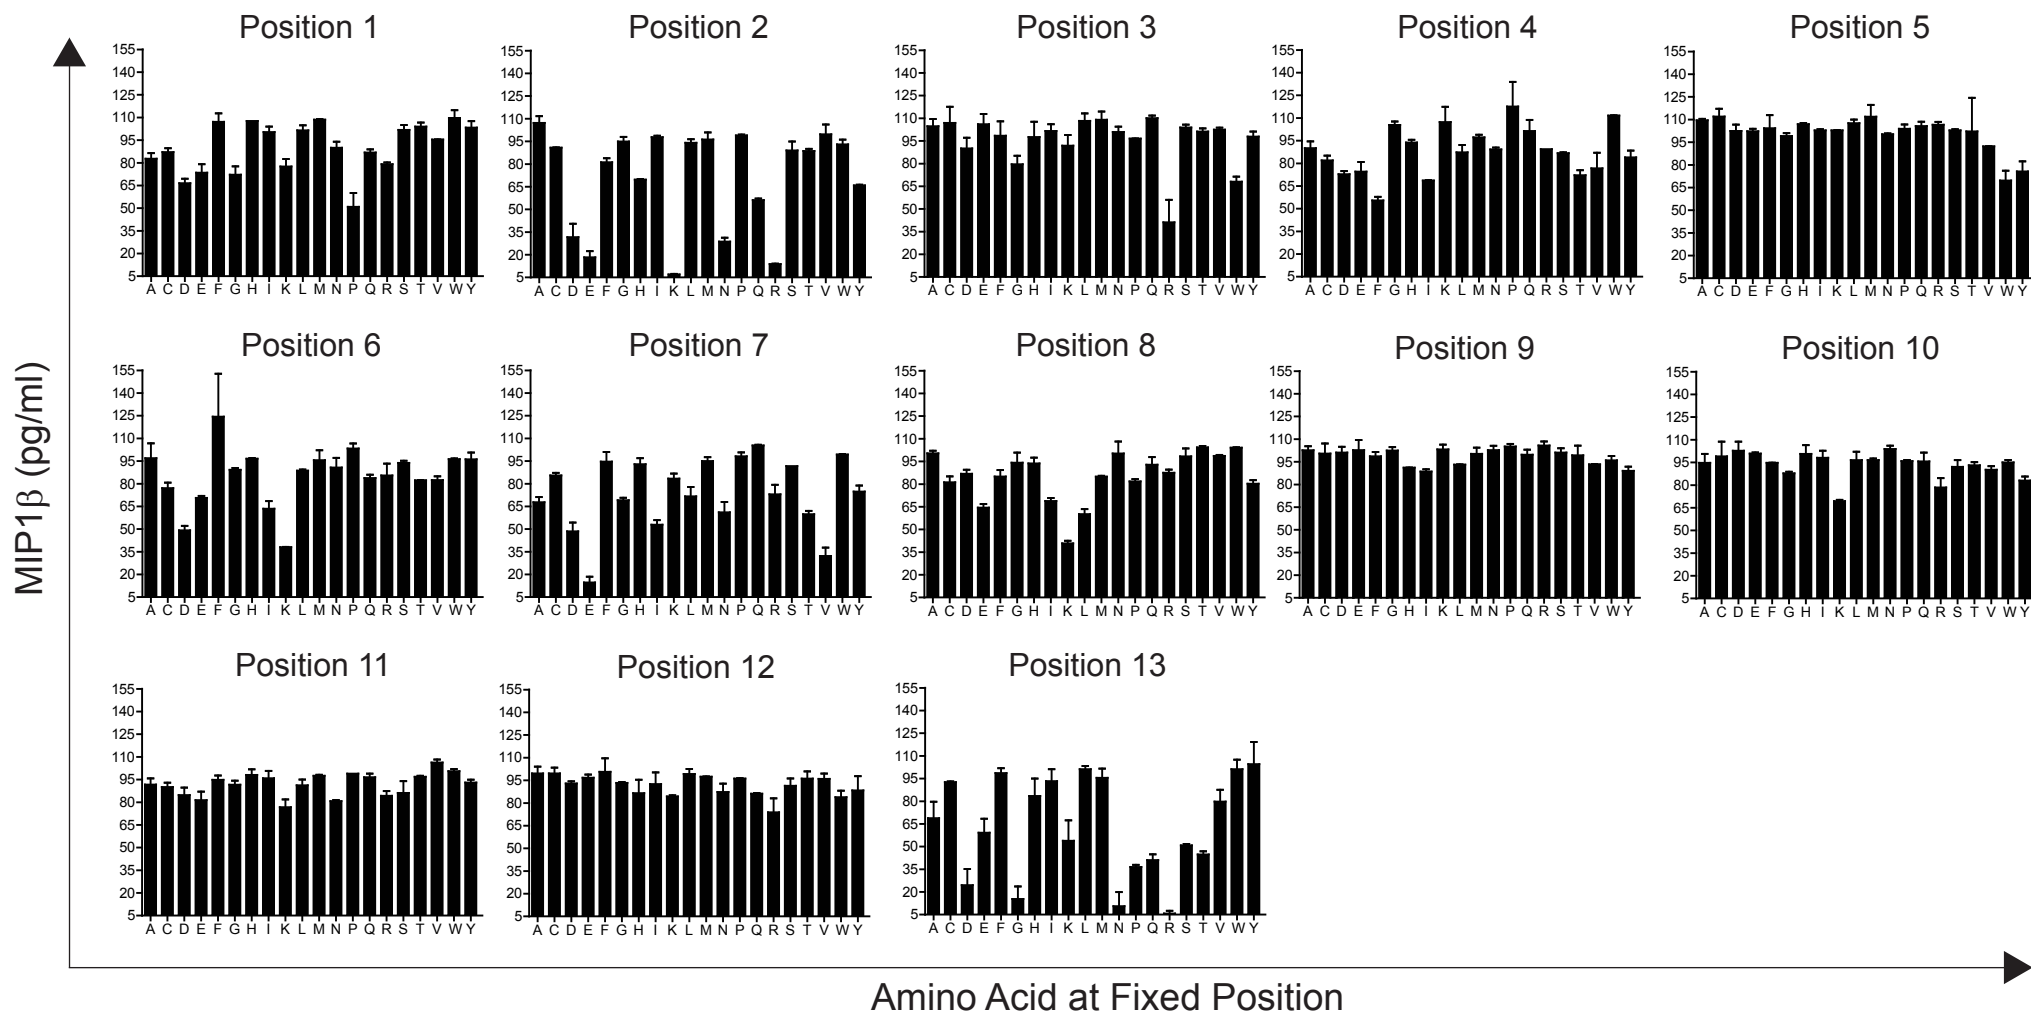

## A: Standard Protocol

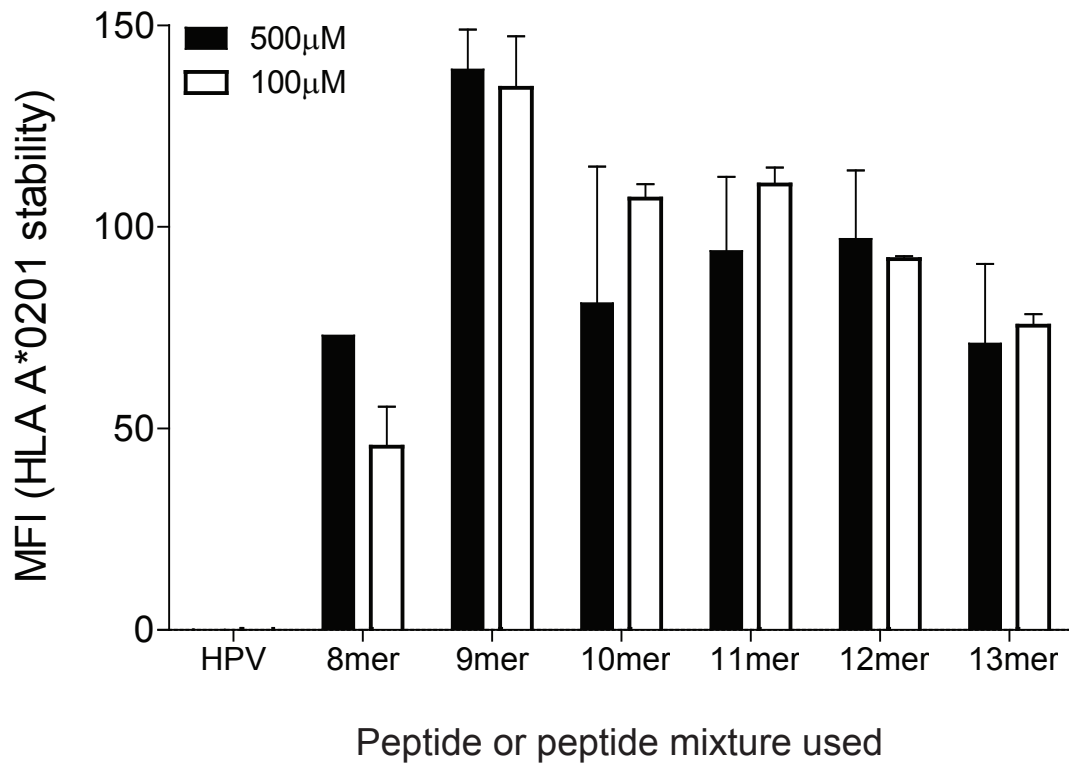

## B: Melting Protocol

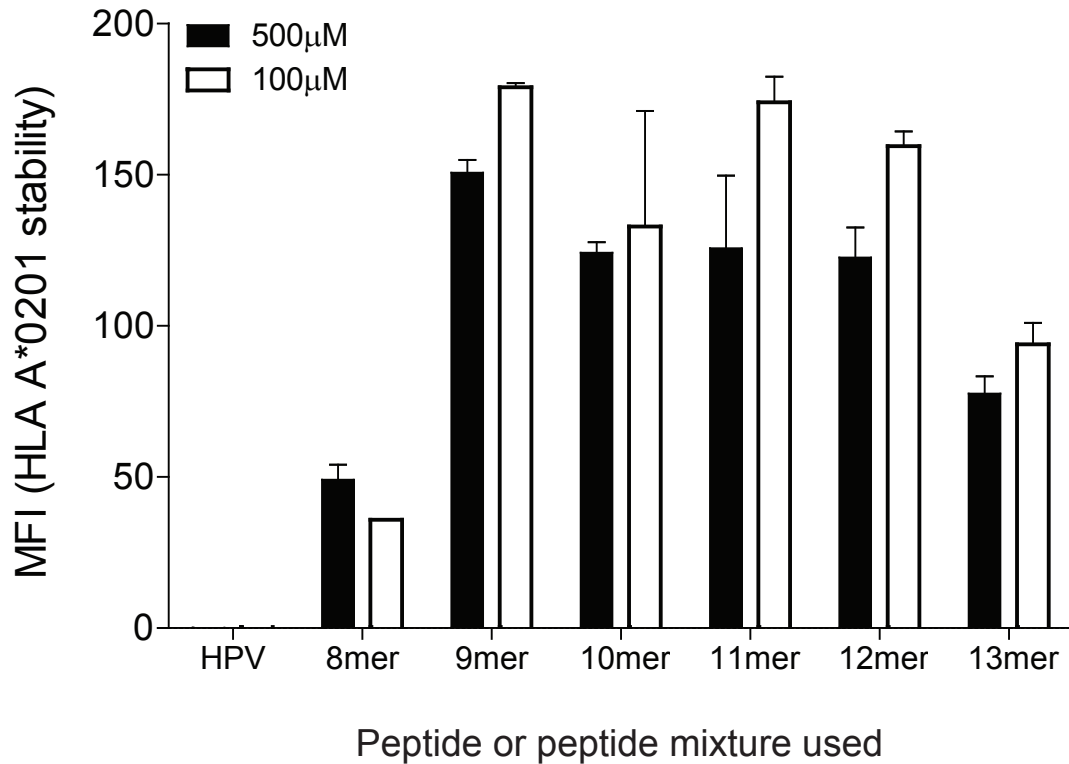

Figure S7

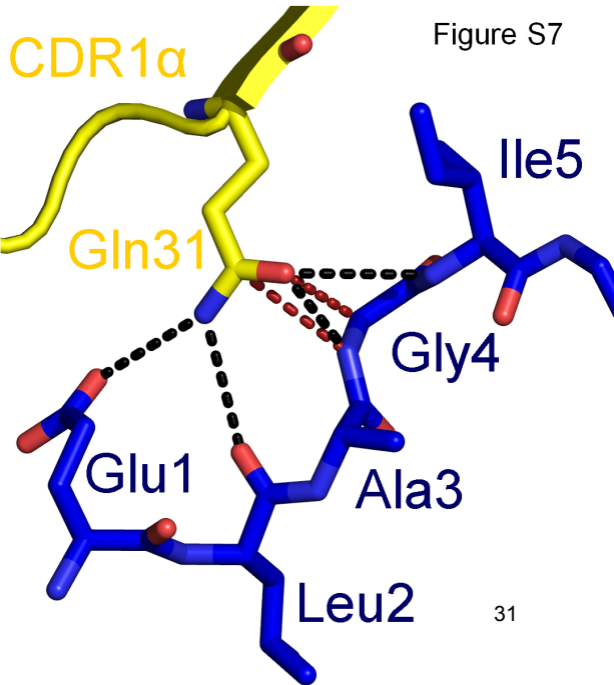

## A: 11mer biased sampling

| Number       | Peptide Sequence | pEC <sub>50</sub> -<br>pEC <sub>50</sub> (index) |
|--------------|------------------|--------------------------------------------------|
| <b>Index</b> | ALWGPDPAAA       | 0                                                |
| <b>1</b>     | YMETQPDFPTA      | -3.857026417                                     |
| <b>2</b>     | YQITPPIFLKR      | -4.076353031                                     |
| <b>3</b>     | RDEITYRFPTG      | -4.255877311                                     |
| <b>4</b>     | RQEWPPMFFIG      | -4.661464173                                     |
| <b>5</b>     | WQETGPMFRNF      | -4.688921303                                     |
| <b>6</b>     | YQEWGDIWPLG      | -4.996010737                                     |
| <b>7</b>     | WQITPPDDFIG      | -5.020000311                                     |
| <b>8</b>     | NIITGPHFRII      | -5.102310623                                     |
| <b>9</b>     | WQITGPMIRIG      | -5.681094549                                     |
| <b>10</b>    | YMQTTDRFRIG      | -5.797596935                                     |
| <b>11</b>    | YDIWGPIFRII      | -5.849335338                                     |
| <b>12</b>    | VQETPPIFRHV      | -5.896686297                                     |
| <b>13</b>    | MQQTGPDIRIG      | -6.132221085                                     |
| <b>14</b>    | EQITGPIIPTG      | -6.265725438                                     |
| <b>15</b>    | WMQWGPDPFPG      | -6.446676225                                     |
| <b>16</b>    | KDIFSDIFRTI      | -6.549390411                                     |
| <b>17</b>    | MDLTGPMFRKA      | -6.906850047                                     |
| <b>18</b>    | YMQWTPDFFIG      | -7.101066239                                     |
| <b>19</b>    | NMIFGSHFRLG      | -105.9132494                                     |
| <b>20</b>    | TQFWPPIFPLI      | -159.7550993                                     |
| <b>21</b>    | SEEWPPRIRIQ      | -187.5793078                                     |
| <b>22</b>    | TLEWGPMFPKG      | -214.42073                                       |
| <b>23</b>    | KQHTGDDFPKD      | -367.0314757                                     |
| <b>24</b>    | SQITGPMFPRV      | -821.1961667                                     |
| <b>25</b>    | NIEWPPRIRIF      | -1151.492692                                     |
| <b>26</b>    | MQIVPDHFRIW      | -1155.982093                                     |
| <b>27</b>    | RAFVGRDFRKG      | -3224.023004                                     |
| <b>28</b>    | NRIVGDIFFPKG     | -6428.198759                                     |
| <b>29</b>    | SMIWPPIMRKG      | -12817.2863                                      |
| <b>30</b>    | YMIWGDIFLNN      | -25612.46014                                     |

## B: 12mer biased sampling

| Number       | Peptide Sequence | pEC <sub>50</sub> -<br>pEC <sub>50</sub> (index) |
|--------------|------------------|--------------------------------------------------|
| <b>Index</b> | ALWGPDPAAA       | 0                                                |
| <b>1</b>     | MMLWLRWIDVPT     | -0.89411                                         |
| <b>2</b>     | KPADIIDALVPV     | -3.37882                                         |
| <b>3</b>     | VVAPIWESLSNV     | -3.86078                                         |
| <b>4</b>     | KQRPWIGDLMQG     | -4.03667                                         |
| <b>5</b>     | RQSHIAQLLGMV     | -4.1435                                          |
| <b>6</b>     | RQVNIWWLDMQL     | -4.15599                                         |
| <b>7</b>     | KPFDWNPFLMRT     | -4.16008                                         |
| <b>8</b>     | KWPGIISLSPL      | -4.21619                                         |
| <b>9</b>     | RLPGVPGILGRM     | -4.29965                                         |
| <b>10</b>    | KPVPNNTWGTW      | -4.3645                                          |
| <b>11</b>    | RLWGIAFGDMKL     | -4.40015                                         |
| <b>12</b>    | RMPTINGILTKM     | -4.40383                                         |
| <b>13</b>    | IARLPTVDSTAV     | -4.43509                                         |
| <b>14</b>    | LLYGIDDSLGL      | -4.46247                                         |
| <b>15</b>    | KLQEVIFILMML     | -4.49806                                         |
| <b>16</b>    | RQWPLIVGDDML     | -4.50341                                         |
| <b>17</b>    | LQVAVNGWLMQM     | -4.53334                                         |
| <b>18</b>    | IMQFVRDISLPT     | -4.61329                                         |
| <b>19</b>    | RLLYIIFLGEVG     | -4.62168                                         |
| <b>20</b>    | RMTGIIIGDDLQG    | -4.657                                           |
| <b>21</b>    | RVMGLDFMGPQV     | -4.6655                                          |
| <b>22</b>    | RMPMLIWWAMLV     | -4.67491                                         |
| <b>23</b>    | KIPGINMDLVIV     | -4.71077                                         |
| <b>24</b>    | MLPPVIFWLTEV     | -4.83171                                         |
| <b>25</b>    | RVPDIATAEVNV     | -4.96712                                         |
| <b>26</b>    | IQPPVIRGIDMPV    | -5.11124                                         |
| <b>27</b>    | MLMDIDWSMGPM     | -5.14999                                         |
| <b>28</b>    | YQPLIRVPLDPM     | -5.51261                                         |
| <b>29</b>    | GTWMIIFIWSPV     | -212724                                          |
| <b>30</b>    | LIPDNNFIAEPS     | -425432                                          |



**Table S2** Data collection and refinement statistics (molecular replacement).

|                                             |                                               |
|---------------------------------------------|-----------------------------------------------|
| Data set statistics                         | HLA A*0201-ILAKFLHRL                          |
| Space group                                 | P2 <sub>1</sub> 2 <sub>1</sub> 2 <sub>1</sub> |
| Unit cell parameters (Å, °)                 | a=49.2, b=74.9, c=125.8                       |
| Radiation source                            | DIAMOND I03                                   |
| Wavelength (Å)                              | 0.9763                                        |
| Resolution (Å)                              | 49.2 - 1.78                                   |
| Unique reflections                          | 45414 (3326)                                  |
| Completeness (%)                            | 100                                           |
| Multiplicity                                | 7.1 (6.5)                                     |
| I/Sigma(I)                                  | 10 (2.4)                                      |
| Rmerge (%)                                  | 0.109 (0.677)                                 |
| No reflections used                         | 43,626                                        |
| Rcryst (no cutoff) (%)                      | 18                                            |
| Rfree (%)                                   | 22.7                                          |
| Bond lengths (Å)                            | 0.022                                         |
| Bond angles (°)                             | 1.845                                         |
| Mean B value (Å <sup>2</sup> )              | 26.3                                          |
| Outliers Ramachandran plot (%)              | 0                                             |
| Overall ESU based on Maximum Likelihood (Å) | 0.082                                         |

One crystal was used for data collection.  
Values in parentheses are for highest-resolution shell.
